1 **A 19-isolate reference-quality global pangenome for the**  
2 **fungal wheat pathogen *Zymoseptoria tritici***

3

4 Thomas Badet<sup>1</sup>, Ursula Oggenfuss<sup>1</sup>, Leen Abraham<sup>1</sup>, Bruce A. McDonald<sup>2</sup>, Daniel Croll<sup>1, \*</sup>

5

6 <sup>1</sup> Laboratory of Evolutionary Genetics, Institute of Biology, University of Neuchâtel, Neuchâtel,

7 Switzerland

8 <sup>2</sup> Plant Pathology, Institute of Integrative Biology, ETH Zürich, Zürich, Switzerland

9

10 \* Corresponding author: [daniel.croll@unine.ch](mailto:daniel.croll@unine.ch)

11

## 12 **Abstract**

13

14 **Background:** The gene content of a species largely governs its ecological interactions and adaptive  
15 potential. A species is therefore defined by both core genes shared between all individuals and  
16 accessory genes segregating presence-absence variation. There is growing evidence that eukaryotes,  
17 similar to bacteria, show intra-specific variability in gene content. However, it remains largely  
18 unknown how functionally relevant such a pangenome structure is for eukaryotes and what  
19 mechanisms underlie the emergence of highly polymorphic genome structures.

20 **Results:** Here, we establish a reference-quality pangenome of a fungal pathogen of wheat based on 19  
21 complete genomes from isolates sampled across six continents. *Zymoseptoria tritici* causes substantial  
22 worldwide losses to wheat production due to rapidly evolved tolerance to fungicides and evasion of  
23 host resistance. We performed transcriptome-assisted annotations of each genome to construct a  
24 global pangenome. Major chromosomal rearrangements are segregating within the species and  
25 underlie extensive gene presence-absence variation. Conserved orthogroups account for only ~60% of  
26 the species pangenome. Investigating gene functions, we find that the accessory genome is enriched  
27 for pathogenesis-related functions and encodes genes involved in metabolite production, host tissue  
28 degradation and manipulation of the immune system. *De novo* transposon annotation of the 19  
29 complete genomes shows that the highly diverse chromosomal structure is tightly associated with  
30 transposable elements content. Furthermore, transposable element expansions likely underlie recent  
31 genome expansions within the species.

32 **Conclusions:** Taken together, our work establishes a highly complex eukaryotic pangenome  
33 providing an unprecedented toolbox to study how pangenome structure impacts crop-pathogen  
34 interactions.

## 35 **Background**

36

37 Microbial species harbor substantial functional diversity at the level of gene presence-absence  
38 variation (Tettelin *et al.* 2008). Genes not fixed within a species (*i.e.* accessory genes) can account for  
39 a large fraction of the full gene repertoire (*i.e.* the pangenome). In bacteria, the proportion of core  
40 genes in the pangenome can range from 5-98% and challenge taxonomic classifications (Ramasamy  
41 *et al.* 2014; Rouli *et al.* 2015). The wide spectrum of pangenome sizes across species can be  
42 associated with the species distribution and lifestyle (McInerney *et al.* 2017). Species showing a wide  
43 geographical distribution and large population sizes characterized by frequent genetic exchange tend  
44 to have expansive, open pangenomes (Lefébure *et al.* 2010). In microbial pathogens, accessory genes  
45 play a major role in virulence and environmental adaptation (Jackson *et al.* 2011; Sánchez-Vallet *et*  
46 *al.* 2018a; Wu *et al.* 2018). The notion of a pangenome led to the discovery that major elements of  
47 intra-specific variation are often ignored in studies relying on a single reference genome. Large  
48 pangenomes also can challenge association studies aiming to identify the genetic basis of phenotypic  
49 traits because mapping is often performed against a single reference genome, making potentially  
50 relevant genetic variation inaccessible (Marschall *et al.* 2016; Sánchez-Vallet *et al.* 2018b). Despite  
51 their importance for unravelling the genetic basis of adaptive evolution, only a very limited number of  
52 eukaryotic species have well established pangenomes.

53

54 Copy number variation including gene deletion generates intraspecific gene content variation in  
55 nearly all species (Schridder & Hahn 2010). This variation can create extreme variance in fitness and  
56 promote adaptive evolution (Araki *et al.* 2006; Brynildsrud *et al.* 2016; Plissonneau *et al.* 2016a;  
57 Hartmann *et al.* 2018). In plant pathogens, the ability to infect a host often relies on the secretion of  
58 effector proteins that interfere with the host cell machinery (Wit De *et al.* 2009; Lo Presti *et al.* 2015;  
59 Toruño *et al.* 2016). Host plants evolved cognate resistance proteins that are able to recognize effector  
60 proteins and trigger immunity (Jones & Dangl 2006). Gains and losses of effector genes can therefore  
61 have a major impact on the outcome of host-pathogen interactions and challenge food security.

62 Recent studies on fungal pathogens highlighted that genes showing presence-absence variation are  
63 enriched for predicted effectors (Yoshida *et al.* 2016; Hartmann & Croll 2017; Hartmann *et al.* 2018).  
64 Effectors and transposable elements (TEs) are often tightly associated with fast-evolving  
65 compartments of the genome (Sperschneider *et al.* 2015; Faino *et al.* 2016), also known as the “two-  
66 speed” genome architecture (Dong *et al.* 2015). However, how TEs impact the birth and death of  
67 effectors in fast-evolving compartments remains largely unclear (Fouché *et al.* 2018a; Sánchez-Vallet  
68 *et al.* 2018a). The construction of pathogen pangenomes enabled crucial insights into functional  
69 diversity and the evolutionary trajectories of host adaptation. Recent pangenome analyses of four  
70 fungal species including opportunistic pathogens revealed that between ~9-19% of the pangenome is  
71 accessory. Accessory gene localization was preferentially in subtelomeric regions, suggesting both a  
72 mechanistic link to repeat-rich regions and relaxation of selective constraints (McCarthy & Fitzpatrick  
73 2019). The wheat pathogen *Zymoseptoria tritici* was found to have one of the largest eukaryotic  
74 pangenomes with an estimate of at least 42% of all genes being accessory (Plissonneau *et al.* 2018).  
75 However, eukaryotic pangenomes remain shallow and are often based on not fully resolved  
76 chromosomal sequences.

77

78 Fungal plant pathogens such as *Z. tritici* show extreme cases of genome plasticity. The reference  
79 genome of *Z. tritici* has 21 chromosomes, of which eight are accessory and segregate presence-  
80 absence variation in populations (Goodwin *et al.* 2011). The pathogen rapidly evolved virulence on  
81 resistant wheat cultivars and has overcome all current fungicides (Cools & Fraaije 2008; Lucas *et al.*  
82 2015; Blake *et al.* 2018). Host adaptation was driven among other factors by the rapid deletion of an  
83 effector gene and structural rearrangements (Hartmann *et al.* 2017; Krishnan *et al.* 2018; Meile *et al.*  
84 2018). Pathogen populations are highly diverse with high rates of recombination (Croll *et al.* 2015;  
85 Stukenbrock & Dutheil 2018; Grandaubert *et al.* 2019). Meiosis can trigger large chromosomal  
86 rearrangements and lead to aneuploid chromosomes in the species (Croll *et al.* 2013; Fouché *et al.*  
87 2018b). A pangenome constructed for five *Z. tritici* isolates revealed that chromosome length  
88 variation segregating within populations was mainly due to the presence-absence variation of large  
89 TE clusters (Plissonneau *et al.* 2016b, 2018). Furthermore, accessory genes tended to form clusters

90 dispersed along chromosomes. Accessory genes also tended to be in closer proximity to TEs than core  
91 genes and were therefore more likely to be affected by epigenetic silencing (Plissonneau *et al.* 2018).  
92 However, the constructed pangenome was very likely incomplete given the fact that four of the  
93 genomes originated from isolates collected in the same year from two nearby fields. Furthermore,  
94 accessory genes were enriched for pathogenesis-related functions but the pangenome size did not  
95 reach saturation. Given the global impact of the pathogen and the importance of accessory genes for  
96 adaptive evolution, a comprehensive pangenome capturing worldwide genetic diversity is essential.

97

98 In this study, we constructed the pangenome of *Z. tritici* by including 19 isolates sampled from six  
99 different continents and covering the global distribution of the pathogen. We find major chromosomal  
100 rearrangements segregating within the species together with extensive presence-absence variation for  
101 a range of pathogenicity-related gene functions. We also found major shifts in the TE content across  
102 the species. Our data represent the largest eukaryotic pangenome to date based on complete genome  
103 assemblies, providing an unprecedented toolbox for the analysis of adaptive evolution of pathogens.

104

105

## 106 **Results**

107

### 108 **Major chromosomal rearrangements segregating within the species**

109 We constructed a global pangenome of *Z. tritici* based on 19 isolates sampled from six continents and  
110 13 different countries (Figure 1A). The isolates included the previously described reference isolate  
111 IPO323 sampled in the Netherlands and four isolates that were isolated from two nearby fields in  
112 Switzerland (Goodwin *et al.* 2011; Plissonneau *et al.* 2016b, 2018). The geographic regions of origin  
113 of the 19 isolates recapitulate a significant environmental gradient in mean annual temperature and  
114 humidity and span the distribution range of the species. The sampling period ranges from 1984  
115 (IPO323) to 2010 (CRI10). Fungicide applications against *Z. tritici* became widespread in the 90s and  
116 early 2000s, hence the sampling covers both pre- and post-fungicide treatment regimes. We

117 sequenced long-read PacBio SMRTbell libraries to a depth of 40-110X and ~20 kb read coverage in  
118 order to generate chromosome-level assemblies. Assembly sizes ranged from 37.13 Mb (IR01\_48b) to  
119 41.76 Mb (Aus01) (Figure 1A). We recovered all eight known accessory chromosomes of the species  
120 but no additional chromosome. The accessory chromosome 18 is most often missing. Accessory  
121 chromosomes display an average of ~37% size variation among isolates and a maximum of 60% for  
122 chromosome 14 (Figure 1B). For core chromosomes, the average size variation accounts for 16% of  
123 chromosome length going up to 23% for chromosome 7.

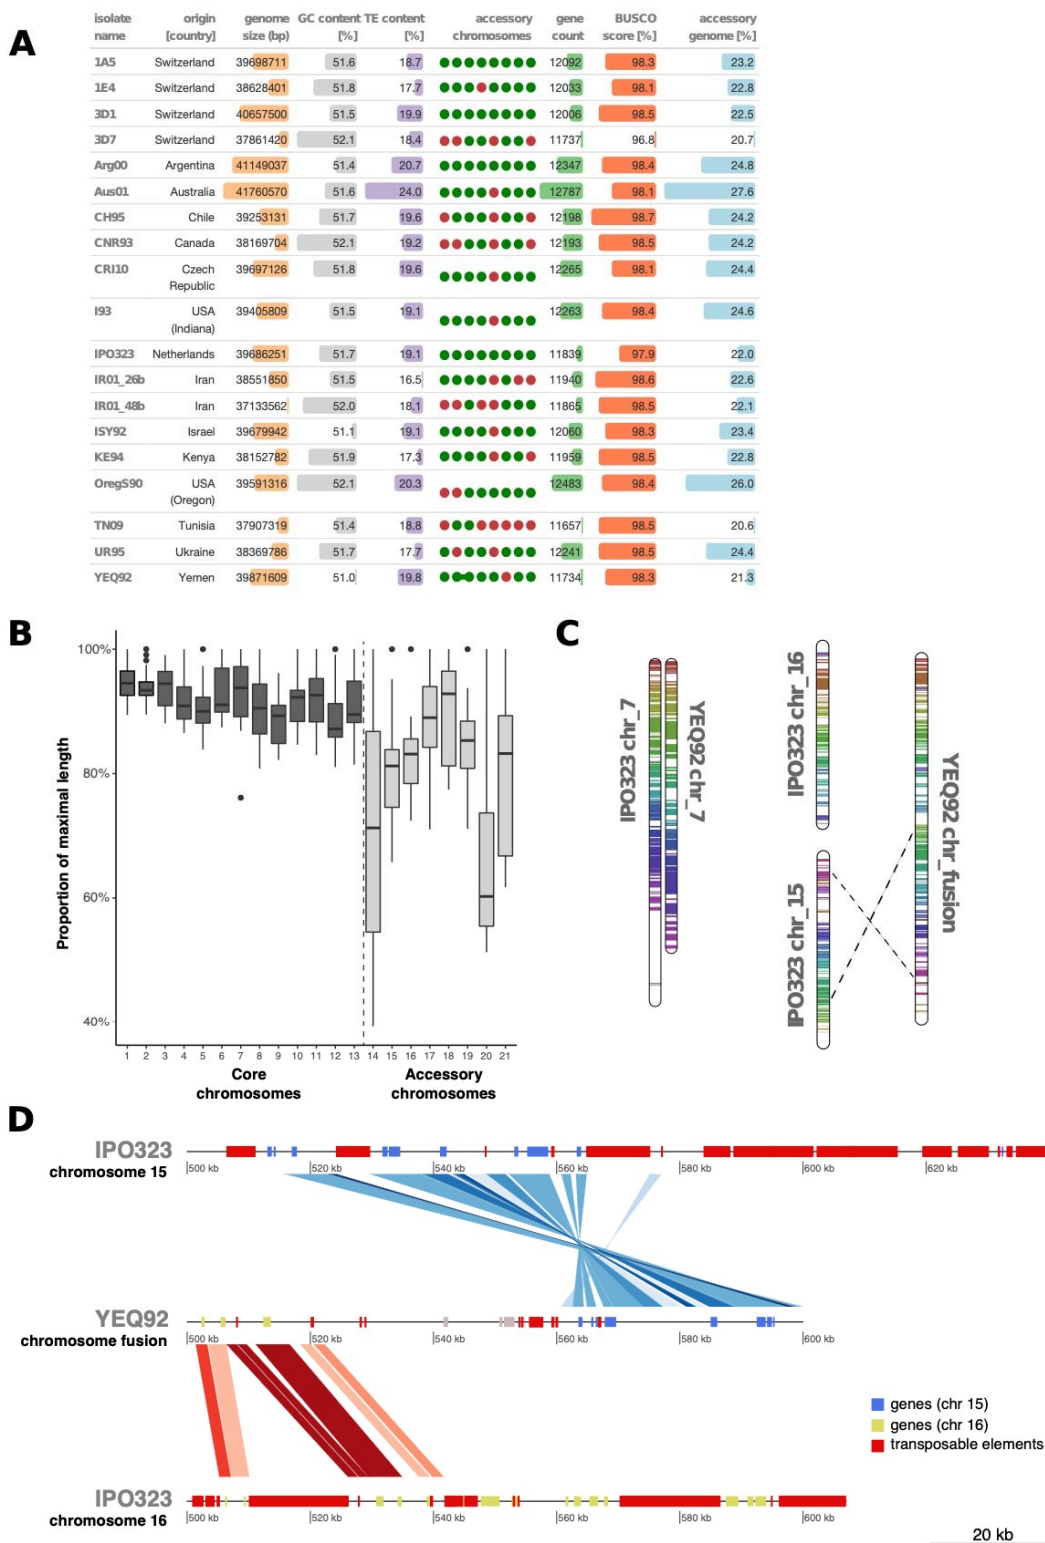

124

125 **Figure 1: Large segregating chromosomal rearrangements.** A. Summary of genome assembly  
 126 characteristics for the 19 isolates. The bars represent the range of minimum to maximum values.  
 127 Accessory chromosomes are shown from chromosome 14-21 with green dots for present and red dots

128 for missing chromosomes. The two linked dots for isolate YEQ92 represent a chromosomal fusion. **B.**  
129 Chromosome size variation. **C.** Two large chromosomal rearrangements present in YEQ92. Colors  
130 indicate macro-syntenic regions between YEQ92 and IPO323 chromosome homologs. The inversion  
131 of chromosome 15 is represented by crossing dotted lines. **D.** Chromosomal fusion of 15 and 16  
132 identified in YEQ92 and compared to the reference genome IPO323. Transposons are shown in red,  
133 genes from chromosome 15 in purple, genes from chromosome 16 in green and genes specific to the  
134 fusion in grey boxes, respectively. Inversions are shown in blue.

135

136 We identified a major deletion spanning 406 kb and encompassing 107 genes on the right arm of core  
137 chromosome 7 of the Yemeni isolate (YEQ92; Figure 1C). The same isolate had chromosome 15  
138 fused to the right arm of chromosome 16. The fusion event is supported by aligned PacBio reads  
139 spanning the region between the two chromosomal segments (Figure S1). The resulting chromosome  
140 is 1.20 Mb long and 49.5 kb shorter than the sum of the homologous chromosomes 15 and 16 of the  
141 IPO323 reference genome. Approximately 90% of the genes on the IPO323 chromosome 15 and 16  
142 belong to accessory orthogroups, as they lack an ortholog in at least one of the other isolates. We find  
143 that the chromosomal fusion deleted about 150 kb affecting 1 and 12 genes on chromosomes 15 and  
144 16, respectively (Figure 1D). We further assessed genome completeness using BUSCO analyses. All  
145 genomes exceed the completeness of the fully finished IPO323 reference genome (97.9%) with the  
146 exception of isolate 3D7 (96.8%; Figure 1A).

147

#### 148 **Substantial gene content variation across the pangenome**

149 We generated RNAseq data to identify high-confidence gene models in all 14 newly assembled  
150 genomes based on a splice-site informed gene prediction pipeline. The total gene count varied  
151 between 11'657 and 12'787 gene models (Figure 1A). We assigned all genes to orthogroups using  
152 protein homology and constructed a pangenome of all 19 complete genomes. The pangenome consists  
153 of a total of 229'699 genes assigned to 15'474 orthogroups. The number of genes assigned per  
154 orthogroup varies among isolates (Figure 2B). Approximately 99.8% of all orthogroups (15'451) are  
155 single gene orthogroups and ~60% of all orthogroups are shared among all 19 isolates (9'193 core  
156 orthogroups). Around 96% of the core orthogroups (8'829 out of 9'193) have conserved gene copy  
157 numbers among isolates. Furthermore, we find that 30% of all orthogroups are shared between some



158 but not all genomes (4'690 accessory orthogroups) and 10% of the orthogroups are composed of  
 159 genes found in a single genome only (1'592 singletons; Figure 2A-B; Supplementary Table 1).

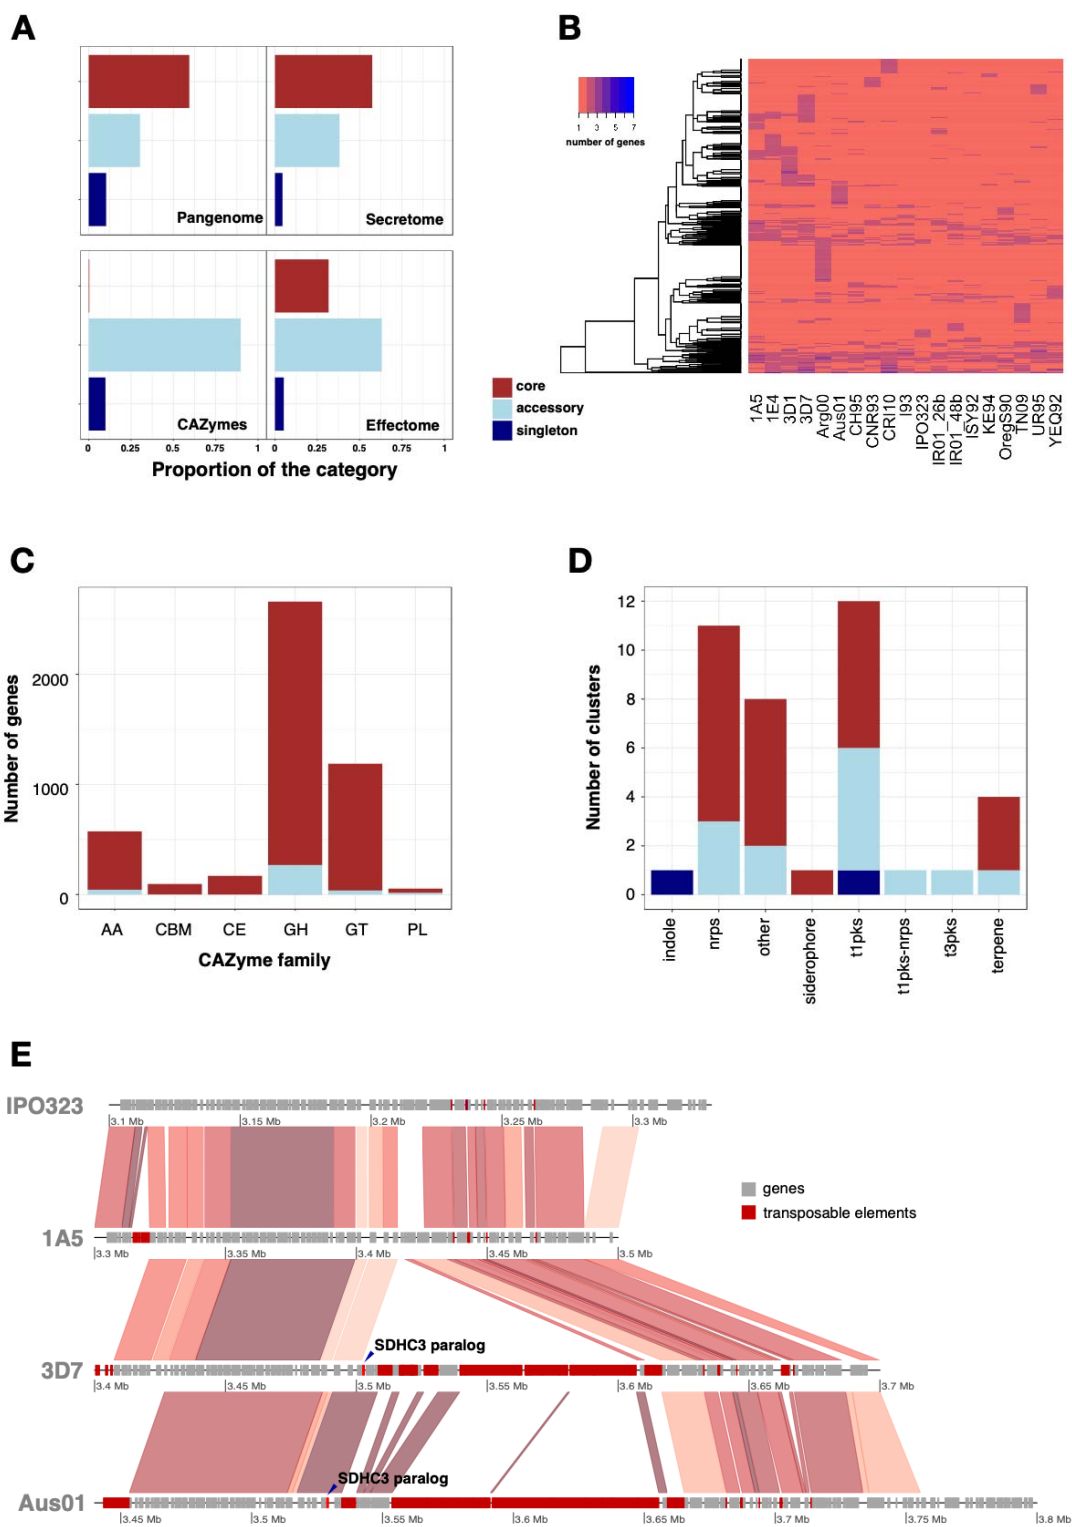

161

162 **Figure 2: Pangenome diversification across gene categories.** **A.** Pangenome proportions across all  
163 genes (upper-left), secreted (upper-right), carbohydrate-active enzymes (CAZymes; lower-left) and  
164 effectors (lower-right). **B.** Gene copy number variation in core orthogroups across the 19 genomes. **C.**  
165 Pangenome gene count across six CAZyme families. Families are divided into glycoside hydrolase  
166 (GH), glycosyl transferase (GT), auxiliary activity (AA), carbohydrate esterase (CE), carbohydrate-  
167 binding modules (CBM) and polysaccharide lyase activity (PL) categories. **D.** Pangenome categories  
168 of secondary metabolite gene clusters.

169

170 To infect wheat, *Z. tritici* relies on specific gene functions (Steinberg 2015; Palma-Guerrero *et al.*  
171 2017). Effectors play a major role in establishing infection and exploiting host resources. Hence, we  
172 analysed how gene functions were structured across the pangenome components. Core orthogroups  
173 showing variation in gene-copy number among isolates include five encoding predicted effectors.  
174 Both accessory proteins and overall effector proteins are less conserved than core proteins at the  
175 amino acid level (Supplementary Figure S2). A total of 3.5% (691) of all orthogroups encode at least  
176 one predicted effector. Among orthogroups encoding at least one predicted effector, 31% were  
177 conserved among all isolates (219), 63% were accessory (436) and 5% were found in only one isolate  
178 (36 singletons). Notably, 99% of the predicted effector genes are located on core chromosomes. In  
179 addition to effectors, enzymes enabling access to nutrients are important pathogenicity components.  
180 We identified a total of 4742 annotated carbohydrate-degrading enzymes (CAZymes) clustered into  
181 263 orthogroups. Notably, 92% of the orthogroups encoding CAZymes were conserved among all  
182 isolates (Figure 2A). CAZymes grouped into 123 subfamilies. Glycoside hydrolases (GH) are the  
183 largest family and account for 57% of all annotated CAZymes (151 orthogroups for 2717 genes).  
184 Glycosyl transferases (GT) are the second most abundant family with 1188 genes and 66 orthogroups  
185 (25% of all CAZymes) (Figure 2C). We also identified 33 orthogroups encoding for auxiliary  
186 activities (AA), 9 for carbohydrate esterase activity (CE), 6 for carbohydrate-binding modules (CBM)  
187 and 3 for polysaccharide lyase activity (PL). The PL family includes 29% accessory genes. Across  
188 CAZyme families, 0-10% of the genes are accessory (Figure 2C). We found a singleton GH43  
189 subfamily gene in the genome of the Australian isolate (Aus01).

190

191 The production of secondary metabolites contributes significantly to virulence and competitive  
192 abilities of fungal pathogens. We identified between 29 and 33 secondary metabolite gene clusters per  
193 genome depending on the isolate. A total of 70% of all genes predicted as components of a  
194 biosynthetic gene cluster are conserved between all isolates and 30% are accessory (Figure 2D, Figure  
195 S3). We identified 39 syntenic gene clusters in the pangenome classified into 12 type 1-polyketide  
196 synthase (PKS), 11 non-ribosomal peptide synthetase (NRPS), four terpene, one type 3-PKS, one  
197 siderophore, one indole and eight unclassified clusters. Sixteen (40%) of the identified syntenic  
198 clusters show presence-absence variation. In the CH95 isolate, a gene cluster on chromosome 7 was  
199 annotated as unclassified but annotated as a NRPS in 17 other isolates and absent from the IPO323  
200 reference genome. The sole indole and type 1-PKS clusters located on chromosomes 5 and 10,  
201 respectively, were only found in isolate TN09. Two type 1-PKS and one NRPS cluster were missing  
202 in the isolates YEQ95, Aus01 and IPO323, respectively. Among the 39 identified syntenic gene  
203 clusters, 23 included a predicted effector and nine included a gene annotated as a cell-wall degrading  
204 enzyme.

205

206 The emergence of fungicide tolerance in *Z. tritici* is a major threat to wheat production. Succinate  
207 dehydrogenase (SDH) inhibitors are commonly used as control agents (Lucas *et al.* 2015; Steinhauer  
208 *et al.* 2019). We identified five SDH orthologs, of which three were conserved among all genomes  
209 (SDHB, SDHC and SDHD subunits). We find two distinct SDHC paralogs SDHC2 and SDHC3 in  
210 eleven and two isolates, respectively. The SDHC3 paralog conferring standing resistance to SDH  
211 inhibitors is located flanking a large cluster of TEs, suggesting that chromosomal rearrangements  
212 were underlying the paralog emergence (Figure 2E). Genes encoding major facilitator superfamily  
213 (MFS) transporters, which can confer multidrug resistance in *Z. tritici* (Omrane *et al.* 2017), grouped  
214 into 336 orthogroups for a total of 5'787 genes (Supplementary Table 2). We find that 39 (11%) of  
215 these orthogroups are part of a predicted secondary metabolite gene cluster and one is an annotated  
216 CAZyme from the GH78 family. Overall, the results reveal that gene families essential for  
217 pathogenicity and fungicide resistance show unexpectedly high levels of presence-absence variation  
218 in the *Z. tritici* pangenome.

219

220 **Strong expression variation across major gene functions**

221 Differential gene expression is a major driver of intraspecific phenotypic differences. We performed  
222 mRNA-sequencing of all 19 isolates grown on minimal media. Minimal media induces filamentous  
223 growth of *Z. tritici*, mimicking the morphology and nutrient starvation that occurs early during plant  
224 infection. We investigated isolate-specific gene expression by self-mapping RNAseq reads to each  
225 isolate's genome assembly. Overall, 91.3% of the genes show expression on minimal media and 68%  
226 have expression of more than 10 counts per million (CPM) (Figure 3A). Core genes have higher  
227 expression than accessory genes (Figure S4). Among the genes showing no expression on minimal  
228 media, 501 are predicted effector genes (8% of predicted effectors), 93 are predicted CAZymes (2%  
229 of CAZymes) and 838 are members of a predicted gene cluster (10% of all gene cluster genes).  
230 CAZymes are overall highly expressed on minimal media (~77% with CPM >10) when compared to  
231 effectors (~45% with CPM >10) and gene cluster genes (~60% with CPM >10) (Figure 3A). About  
232 53% of core single copy orthogroups with non-zero expression have a coefficient of variation >50%  
233 (Figure 3B). Similarly, ~68% of CAZymes and ~60% of genes that are part of a secondary metabolite  
234 cluster have expression coefficient of variation > 50%. In contrast, about 90% of orthogroups  
235 encoding predicted effectors have a coefficient of variation >50%, together with ~81% of accessory  
236 orthogroups.

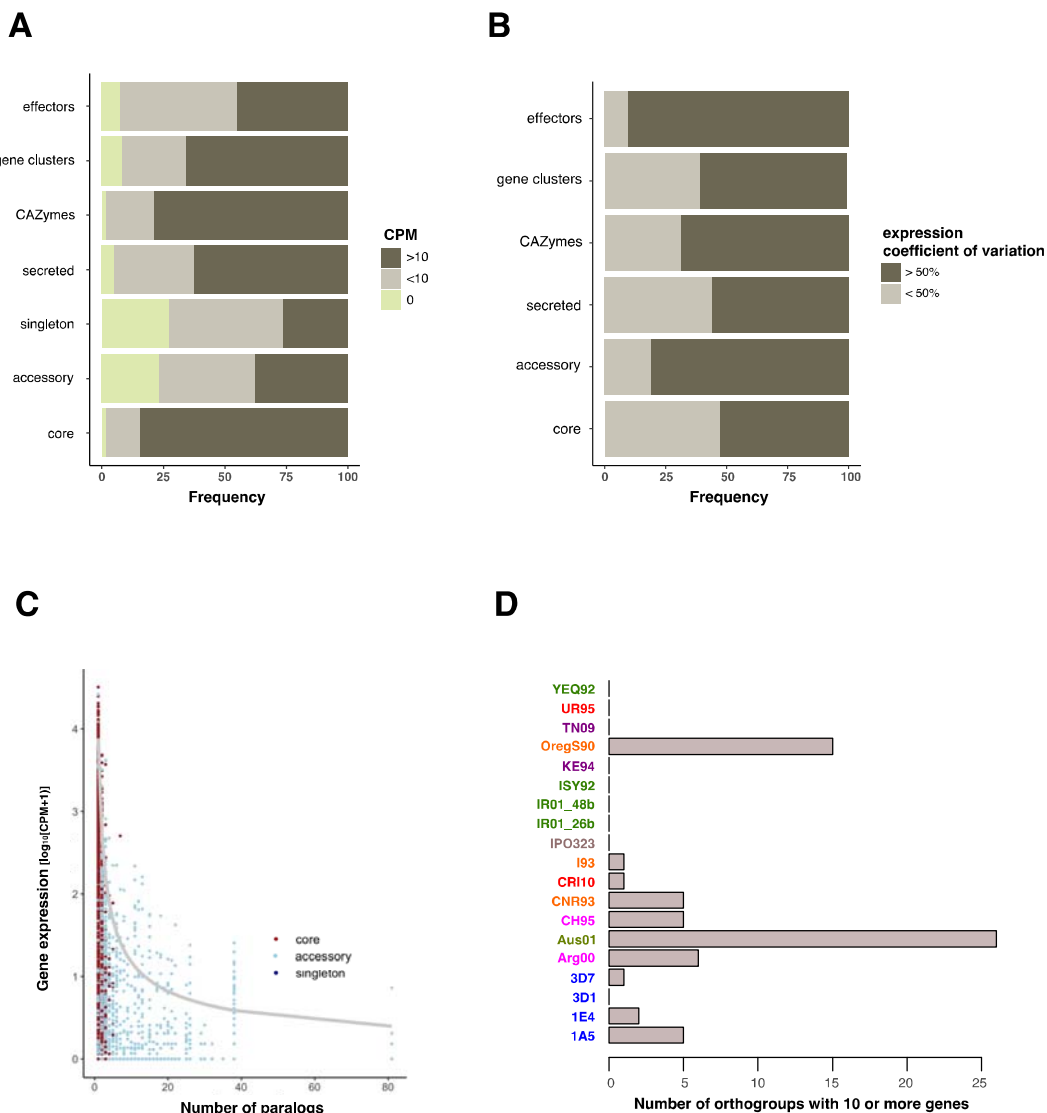

237

238 **Figure 3: Expression polymorphism as a function of the pangenome.** **A.** Proportion of genes  
 239 showing expression >10 counts per million (CPM) across genes categories. **B.** Proportion of  
 240 orthogroups for which the expression coefficient of variation is >50% [ $cov = sd(CPM) / mean$   
 241 (CPM)] among different gene categories. As is (A) we show results for orthogroups with annotated  
 242 effectors, secondary metabolite cluster genes (gene cluster), carbohydrate-active enzymes  
 243 (CAZymes), secreted genes, or annotated as singleton, accessory and core in the pangenome. **C.**  
 244 Variation of single gene expression with the number of paralogs per genome. The grey line shows the  
 245 logarithmic regression calculated as the linear model  $\log_{10}(CPM+1) \sim \log_{10}(\text{number of paralogs})$ . **D.**  
 246 Number of orthogroups with 10 or more paralogs per genome. Isolates are colored by continent of  
 247 origin.

248

249

250 To identify broad patterns in the pangenome expression landscape, we performed a clustering analysis

251 of all core single gene orthogroups. We find that expression clustering does not reflect the

252 geographical origin or genetic distance with the exception of the four Swiss isolates (1A5, 1E4, 3D1  
253 and 3D7; Figure S5). We also analysed the impact of copy-number variation on average expression  
254 and find that single-copy orthologs are on average more highly expressed. In addition, we show that  
255 gene expression rapidly decreases if an orthogroup includes 2-8 paralogs (Figure 3C).

256

### 257 **A highly variable transposable element content within the species**

258 TEs are drivers of pathogen evolution by generating adaptive genetic variation. To identify genes with  
259 a potential role in the mobilisation of TEs, we analysed large homology groups. Among the  
260 orthogroups with 10 or more paralogs, ~88% of the genes encode proteins without homology in  
261 databases, ~7% of the genes encode nucleic acid binding functions (GO:0003676), ~2% of the genes  
262 encode a retrotransposon nucleocapsid (GO:0000943) and ~1.5% of the genes encode a DNA  
263 integration domain (GO:0015074). Orthogroups with 10 or more paralogs are all accessory. For  
264 isolates sharing the same large orthogroups, we identified variability in the gene copy number within  
265 those orthogroups. Indeed, the isolates Aus01 and OregS90 have 26 and 16 orthogroups, respectively,  
266 with more than 10 assigned genes. The isolates I93 and Arg00 count between one and six orthogroups  
267 and nine other isolates have no orthogroups larger than ten genes (Figure 3D). Altogether, these  
268 results show that large orthogroups (>10 genes) essentially regroup genes that belong to TEs. Our data  
269 also indicates regional TE-driven genome expansions given the enlarged genome sizes in Australian  
270 and North American isolates.

271

272 To elucidate the role of transposition on generating genomic variation, we screened the 19 genomes  
273 for TE content. For this, we jointly analysed all complete genomes to exhaustively identify repetitive  
274 DNA sequences. We identified a total of 304 high-quality TE family consensus sequences grouped  
275 into 22 TE superfamilies. The GC-content of the consensus sequences is highly variable, ranging from  
276 23-77% (Figure S6). On average, TE superfamilies have a GC-content lower than 50%, except for  
277 unclassified SINE families (RSX; GC% ~50.6). The genomic TE content ranges from 16.48%  
278 (IR01\_26b) to 23.96% (Aus01) and is positively correlated with genome size ( $cor = 0.78, p < 0.001$ ;  
279 Figure 4D). Genome size correlates with genome-wide TE proportions on both core and accessory

280 chromosomes but is negatively correlated with the proportion of coding sequences (Figure S7, S8).  
 281 The average length of individual TEs ranges from 102 to 51'298 bp (Figure S9). The largest element  
 282 is an unclassified LTR (RLX\_LARD\_Thym) on chromosome 7, the size of which ranges from 6'282  
 283 bp in CNR93 to 59'390 bp in ISY92. This particular LTR is present at the locus only in 18 isolates  
 284 including ISY92, which has a fragmented secondary copy on chromosome 3. The  
 285 RLX\_LARD\_Thym insertion on chromosome 7 overlaps with the ribosomal DNA locus and showed  
 286 far above average mapped PacBio read coverage (~250X).

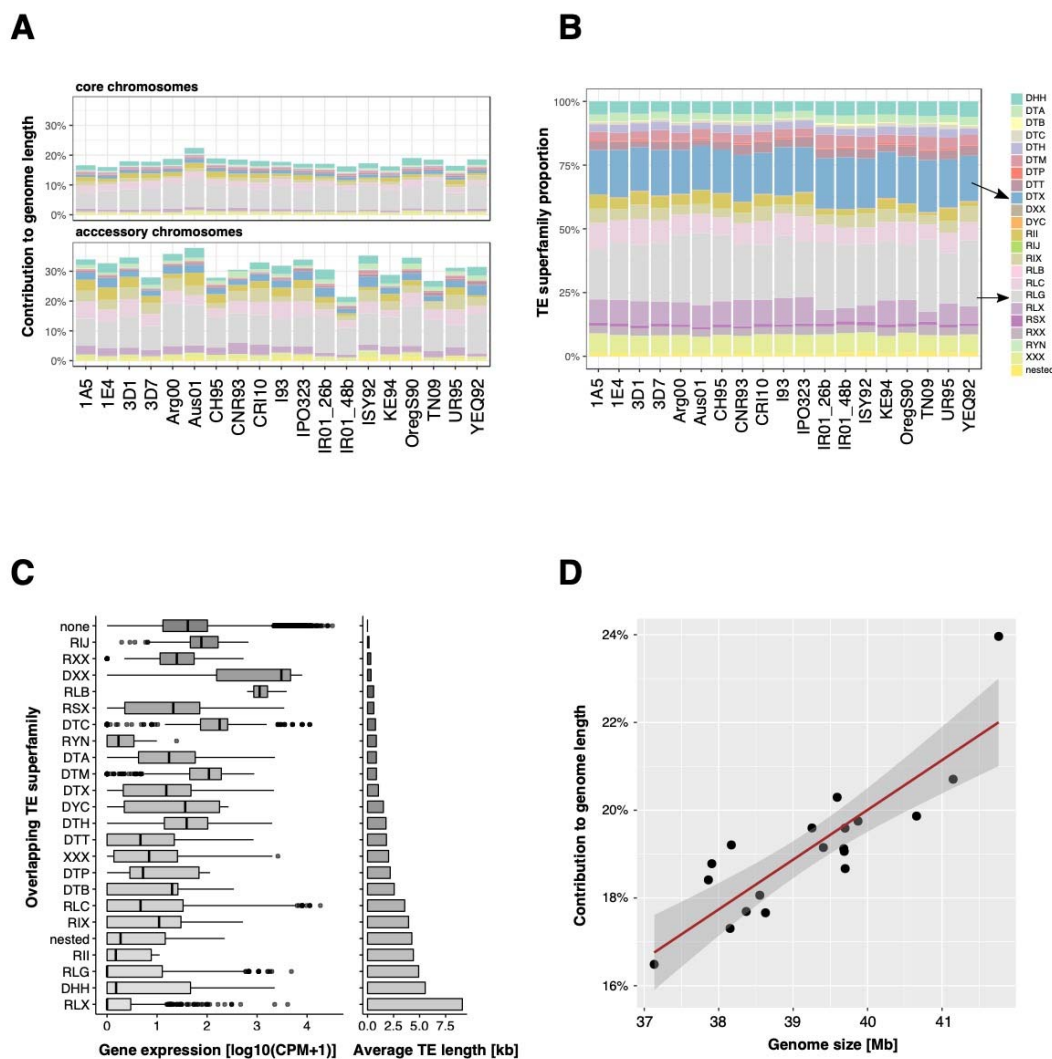

287

288 **Figure 4: Transposable elements (TEs) contribute to *Z. tritici* genome size variation.** A.  
 289 Percentage of the core and accessory genomes covered by TEs across the 19 genomes. B. Relative  
 290 frequency of the 23 TE superfamilies across all genomes. C. Relative impact of TE superfamilies on

291 genes affected by TE insertions ( $\log_{10}$  CPM+1; left panel) and as a function of TE mean length (right  
292 panel). **D.** Correlation of genome-wide TE proportions with total genome size.

293

294 The genome-wide content of TEs shows substantial variation among the 19 isolates, however the  
295 relative abundance of different TE superfamilies is relatively conserved with LTR *Gypsy*, unclassified  
296 TIR and LTR *Copia* elements being the most frequent (Figure 4A-B). Accessory chromosomes  
297 contain consistently higher proportions of TEs compared to core chromosomes (26-41% versus 17-  
298 24%; Figure 4A). Aus01 and OregS90 isolates showed the highest TE content. Interestingly, the  
299 Aus01 genome shows LINE *I*, LTR *Gypsy* and LTR *Copia* family-specific expansion compared to  
300 other genomes. In contrast, the genome of OregS90 shows evidence for expansions of Helitron, LTR  
301 *Gypsy* and LTR *Copia* families. On average, 10% of all TEs overlap with genes. Overall, singleton  
302 and accessory genes tend to be closer to TEs and contain more often TE insertions than core genes  
303 (Figure S11-S12). The isolates Aus01 and OregS90 have 12.8% and 12.4% of all TEs overlapping  
304 with genes, respectively. In addition, Aus01 and OregS90 isolates have 7.4% and 5.4% of all genes  
305 that overlap with TEs, respectively (Figure S13). The composition of TEs inserted into genes reflects  
306 the overall TE composition in the genome, with more abundant TEs being more often inserted into  
307 genes (Figure S14). TEs can carry their own regulatory sequences and are often epigenetically  
308 silenced by the host. We found that orthogroups comprising a gene within 100 bp distance of a TE  
309 show stronger expression variation (~62% of orthogroups with a coefficient of variation >50%)  
310 compared to other orthogroups (~54% of orthogroups with a coefficient of variation >50%) (Figure  
311 S15). We also found that different TE superfamilies have contrasting effects on gene expression, with  
312 longer TEs having more drastic effects (Figure 4C). On average, genes with an inserted TE have  
313 lower expression levels ( $\log_{10}$  CPM ~1.7-fold) and a higher coefficient of variation ( $\log_{10}$  CPM ~2-  
314 fold) compared to genes without an inserted TE (Figure S16).

315

### 316 **TE transcription correlates with relative frequency across isolates**

317 Class I TEs replicate through an RNA intermediate and class II through a DNA intermediate.  
318 Nevertheless, class II TEs can also transcribe into RNA. To gain insights into the mechanisms of  
319 proliferation, we analysed the relative abundance of TE-derived transcripts across all genomes. The



320 highly repetitive nature of TEs typically prevents expression quantification at the individual copy  
321 level. Hence, we focused on normalized TE expression across all copies. Overall, more than 70% of  
322 the TE families have non-zero transcription levels. We find that the largest TE family, an unclassified  
323 LTR identified as RLX\_LARD\_Thrym, was the most transcribed with an average  $\log_{10}$  CPM  $\sim 4.2$   
324 (Figure 5A). An unclassified DTX-MITE is the second most transcribed TE with an average  $\log_{10}$   
325 CPM  $\sim 3.6$  followed by an unclassified TE (*XXX\_Hermione* with an average  $\log_{10}$  CPM  $\sim 3.4$ ). At  
326 the superfamily level, LINES have the highest expression overall followed by the aggregation of  
327 unclassified TEs (Figure 5B). Retroelements are more transcribed than DNA transposons (average  
328  $\log_{10}$  CPM  $\sim 2$  and  $1.2$ , respectively).

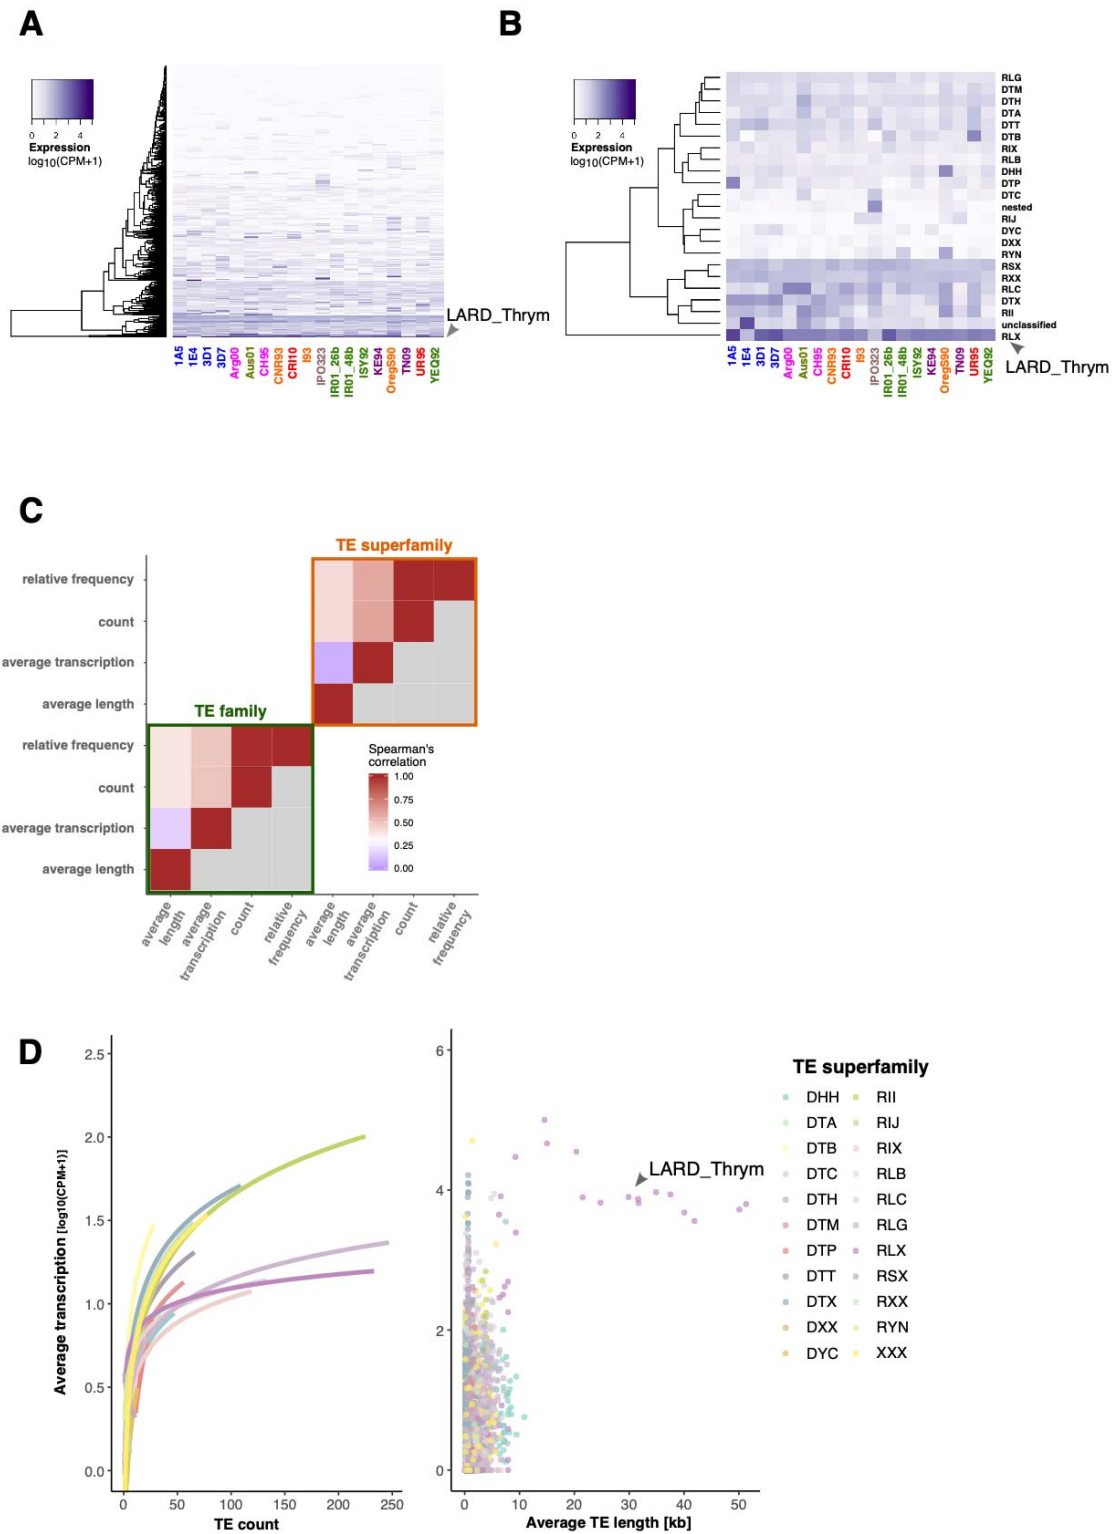

329

330 **Figure 5: Transcriptional activity of transposable elements (TEs) and TE copy numbers.** **A.** TE  
 331 family transcription levels across all 19 genomes expressed as  $\log_{10}$  (CPM +1). **B.** Average  
 332 transcription levels of the 23 TE superfamilies across all genomes (average  $\log_{10}$  (CPM +1)). **C.**

333 Spearman's correlation matrix of four metrics (TE count, TE relative frequency, TE average length  
334 and transcription) at the TE family and superfamily level. **D.** Variation of TE transcription (average  
335  $\log_{10}$  (CPM +1)) as a function of TE count (left panel) or TE average length (right panel). Curves in  
336 the left panel show the logarithmic linear regression given by the linear model  $\log_{10}$  (CPM+1)  $\sim$   $\log_{10}$   
337 (TE count). The large highly expressed LARD\_Thrym family (RLX) is highlighted by arrowheads in  
338 panels A, B, and D (right side).  
339

340 To understand TE expression dynamics across the pangenome, we investigated associations between  
341 TE transcription, length and frequency (Figure 5C). We found TE transcription to be highly correlated  
342 with TE frequency in the genomes (Spearman's  $r = 0.49$ ,  $p < 5e-307$ ) and a weaker correlation at the  
343 TE superfamily level (Spearman's  $r = 0.1$ ,  $p < 5e-13$ ). Furthermore, TE transcription is negatively  
344 correlated with TE length at the superfamily level (Spearman's  $r = -0.4$ ,  $p < 1e-187$ ; Figure 5D).  
345 Interestingly, the average TE superfamily transcription levels are positively correlated with the  
346 frequency of the TE superfamily in the genome (Figure 5D). A notable exception is unclassified SINE  
347 retroelements. The correlation of TE transcription levels and TE frequency in the genome strongly  
348 suggests that transcriptional activity contributed to recent TE expansions in the genome.

349

350

## 351 **Discussion**

352

353 We established a global pangenome of a major fungal wheat pathogen based on the assembly and  
354 analysis of 19 high-quality genomes. *Z. tritici* segregates major chromosomal rearrangements  
355 affecting both the more conserved core chromosomes as well as the highly polymorphic accessory  
356 chromosomes. The gene content is highly variable among genomes with only 60% of all genes being  
357 conserved in the species. Accessory genes encode functions for a wide variety of interactions with  
358 both biotic and abiotic environments. An exhaustive map of TEs across all genomes pinpoints  
359 transposon-associated genome expansions across geographic regions.

360

361 We showed that the *Z. tritici* pangenome is expansive with ~40% accessory orthogroups. Compared  
362 to a previous construction of the *Z. tritici* pangenome based on genomes from a much narrower

363 geographic breadth (Plissonneau *et al.* 2018), we used more relaxed criteria to assign genes into  
364 orthogroups. Based on the tendency to assign more divergent gene variants into the same orthogroup,  
365 we recovered a total of 911 orthogroups with at least one paralog compared to only 76 identified  
366 previously. The number of paralogs remains low compared to species with larger genomes that  
367 retained more paralogs of gene duplication events (Goodwin *et al.* 2011). A likely constraint on gene  
368 duplication is the genomic defence mechanism that introduces repeat-induced point (RIP) mutations  
369 (Selker 2002). Although these defences evolved to suppress transpositional activity of TEs, they can  
370 also affect genome evolution by targeting gene duplicates (Selker 2002; Galagan & Selker 2004).  
371 Recent sequencing efforts oriented around important crop species reported impressively large  
372 accessory genome proportions (Hirsch *et al.* 2014; Zhou *et al.* 2017; Zhao *et al.* 2018). However,  
373 nearly all eukaryotic pangenomes are partially based on short-read assemblies that challenge the  
374 resolution of segregating gene variants within a species. With the conservative estimate of ~24% non-  
375 reference orthogroups, the *Z. tritici* accessory genome is the largest reported for a fungal species to  
376 date (~40% of the pangenome). This falls outside the upper range of comparative analyses of human  
377 fungal pathogens and *S. cerevisiae*, where estimates of the accessory genome ranged from 10-20%  
378 (McCarthy & Fitzpatrick 2019). However, bacterial accessory genomes can range from 0 to 95% of  
379 the total pangenome (Rouli *et al.* 2015). The effective population size of a species, its lifestyle, and  
380 niche heterogeneity are main factors influencing bacterial pangenome sizes (McInerney *et al.* 2017).  
381 Similar to bacteria, the effective population size is likely to be the major factor maintaining a large  
382 accessory genome in *Z. tritici*. Previous studies identified *Z. tritici* as a highly polymorphic species  
383 with a rapid decay in linkage disequilibrium, high SNP densities and high recombination rates (Croll  
384 *et al.* 2015; Hartmann *et al.* 2017). As a consequence, the pathogen likely retains significant  
385 functional variation within populations as long as the variation is nearly neutral.

386

387 Bacterial and fungal genomes show clear functional compartmentalization between core and  
388 accessory genes (McInerney *et al.* 2017; McCarthy & Fitzpatrick 2019). In fungi, core orthogroups  
389 are enriched for housekeeping functions in contrast to an enrichment for antimicrobial resistance and  
390 pathogenicity factors among accessory genes (Plissonneau *et al.* 2018). Here we show that genes

391 encoding carbohydrate-active enzymes (CAZymes) are highly conserved within the species.  
392 CAZymes are involved in the degradation of the host cell wall and other storage compounds (Zerillo  
393 *et al.* 2013; Lyu *et al.* 2015). Strong conservation of the content in CAZymes may reflect a  
394 fundamental adaptation to wheat as a host plant. This contrasts with generalist pathogens, which often  
395 evolved larger CAZyme repertoires (Zhao *et al.* 2013). In contrast to CAZymes, secondary metabolite  
396 gene clusters show substantial presence-absence variation within the species. Fungi produce highly  
397 diverse secondary metabolites that play a role during various life cycle stages, but often have poorly  
398 understood functions (Calvo *et al.* 2002). Plant pathogens were also shown to depend on secondary  
399 metabolite production for full virulence (Pusztahelyi *et al.* 2015). Hence, variation in secondary  
400 metabolite production may underlie variation in virulence. Species from the genus *Aspergillus*  
401 produce a large diversity of secondary metabolites for which the gene clusters often segregate  
402 presence-absence (Kjærboelling *et al.* 2018; Raffa & Keller 2019). The *Z. tritici* pangenome was  
403 constructed from isolates coming from six different continents and a wide array of agricultural  
404 environments. Hence, differences in secondary metabolite production capacity may reflect local  
405 adaptation and trade-offs that balance the cost of metabolite production. Virulence of *Z. tritici* is  
406 thought to be largely governed by gene-for-gene interactions (Brown *et al.* 2015). In such interactions  
407 effector proteins either promote disease or are recognized by the host and trigger resistance (Jones &  
408 Dangl 2006). A gene encoding a recognized effector should therefore be rapidly eliminated from the  
409 species gene pool. *Z. tritici* populations responded rapidly to selection on effector gene loci by either  
410 mutating, deleting or silencing genes (Hartmann & Croll 2017; Krishnan *et al.* 2018; Meile *et al.*  
411 2018). Our global pangenome analysis significantly expands our understanding of effector gene  
412 diversification. We identified 652 orthogroups encoding predicted effector functions of which 63%  
413 are accessory orthogroups. Accessory effector genes may be involved in arms races with strong  
414 selection driving the gain or loss of individual effector genes in populations. As a contrast, we  
415 identified 45 conserved and highly expressed effectors genes potentially encoding indispensable  
416 pathogenicity functions.  
417

418 Ultimate mechanisms generating pangenomes may include large population sizes and niche  
419 complexity, however the proximate mechanisms generating pangenome diversification are poorly  
420 understood. TEs can be key drivers generating structural variation (Beck *et al.* 2011; Kim *et al.* 2019)  
421 and *Z. tritici* readily undergoes TE-mediated chromosomal rearrangements during meiosis (Croll *et al.*  
422 2013; Fouché *et al.* 2018b). Here we show that *Z. tritici* genomes contain 16-24% TEs, with the  
423 overall proportion of TEs accounting for ~70% of the intraspecific genome size variation. Hence, TEs  
424 are key drivers of genome evolution in this species. Among the most drastic chromosomal  
425 rearrangements, we detected a significantly shorter chromosome 7 homolog. The longer homolog was  
426 hypothesized to have originated from a fusion with an accessory chromosome based on evidence from  
427 large scale epigenetic remodelling (Schotanus *et al.* 2015). Our analysis likely identified the ancestral  
428 variant prior to the suspected chromosomal fusion event. Hence, the species retained two major  
429 chromosomal variants of a core chromosome.

430

431 TEs are often implicated in gene copy number variation through duplication or pseudogenisation  
432 events suggesting that TEs directly contribute to pangenome diversification. We show that specific  
433 *Gypsy* and *Helitron* elements were integrated into genes generating highly paralogous orthogroups.  
434 These orthogroups may underlie recent expansions of specific TEs in the genomes of Australian and  
435 Oregon isolates. The *Helitron* element is among the most transcribed TEs in the Oregon isolate,  
436 suggesting a high potential for new transpositions. In contrast, the *Gypsy* element is only weakly  
437 transcribed in the Australian isolate, suggesting that this TE has become deactivated by genomic  
438 defences. In addition to transpositional activity causing loss-of-function mutations in genes, TEs can  
439 also contribute to genome expansions (Naville *et al.* 2019). We found a strong correlation of overall  
440 TE content and genome size across the analysed genomes. Intra-specific variation in genome size is  
441 unexpected. However, local population bottlenecks could lead to changes in mean genome sizes given  
442 the large structural variation segregating among isolates. Hence, the population history might have  
443 impacted genome size evolution. Populations in Australia underwent a significant founder event  
444 during the recent colonization of the continent (Zhan *et al.* 2005). Hence, our observation of an  
445 expanded Australian genome may be causally linked to this bottleneck. Genome expansions may also

446 be triggered by TE activation through mobilisation triggered by stressors such as host infections  
447 (Fouché *et al.* 2019b). Taken together, TE dynamics and large effective population sizes likely  
448 constitute the proximate and ultimate drivers of pangenome size evolution. Understanding the birth  
449 and death cycles of gene functions in such evolving pangenomes will help address major questions  
450 related to crop-pathogen co-evolution.

## 451 **Methods**

452

### 453 **High molecular-weight DNA extraction and single molecule real-time (SMRT) sequencing**

454 Origin and year of sampling of all the isolates are described in Figure 1. High-molecular-weight DNA  
455 was extracted from lyophilized spores following a modified version of a cetyltrimethylammonium  
456 bromide (CTAB) protocol developed for plant tissue described in (Plissonneau *et al.* 2016b). Briefly,  
457 ~100 mg of lyophilized spores were crushed with a mortar and transferred to a phenol-chloroform-  
458 isoamyl alcohol solution. The supernatant was centrifuged and the pellet resuspended twice in fresh  
459 phenol-chloroform-isoamyl alcohol. The resulting pellet was then washed three times and  
460 resuspended in 100  $\mu$ l of sterile water. For each isolate, PacBio SMRTbell libraries were prepared  
461 using between 15  $\mu$ g and 30  $\mu$ g of high molecular-weight DNA. Sequencing was performed on a  
462 PacBio Sequel instrument at the Functional Genomics Center, Zürich, Switzerland.

463

### 464 **Complete genome assemblies**

465 We largely followed the pipeline described in (Yue & Liti 2018). In summary, raw PacBio  
466 sequencing reads were assembled using *Canu* v1.7.1 (Koren *et al.* 2017). All assemblies were  
467 performed with an estimated genomeSize of 39.678 Mb. Two correctedErrorRate (0.045 and 0.039)  
468 and minReadLength (500 and 5000) were tested and the most contiguous chromosome-level  
469 assemblies were retained for further analysis based on reference alignment. Reads were aligned to the  
470 obtained assemblies using *pballign* v0.3.1 from Pacific Biosciences suite  
471 (<https://github.com/PacificBiosciences/pballign>). The assemblies were polished twice using the  
472 software *Arrow* v2.2.2 from the Pacific Biosciences suite with default settings  
473 (<https://github.com/PacificBiosciences/GenomicConsensus>) and chromosome-level assemblies were  
474 performed using *Ragout* v2.1.1 (Kolmogorov *et al.* 2014).

475

### 476 **RNA extraction, library preparation, sequencing and quantification**



477 For isolates 1A5, 1E4, 3D1 and 3D7, RNA sequencing experiments on minimal media were  
478 performed by (Fouché *et al.* 2019a; Francisco *et al.* 2019). Raw reads were retrieved from the NCBI  
479 Short Read Archive accession number SRP077418. Similarly, the 15 additional fungal isolates (Table  
480 S1) were grown in YSB media (10g sucrose + 10g yeast extract per liter) and then 10e5 cells were  
481 inoculated on liquid minimal media without a carbon source (Metzenberg 2003) for 7-10 days prior to  
482 extraction. RNA was extracted using a NucleoSpin® RNA Plant kit following the manufacturer's  
483 instructions. Library preparation was carried out according to the Illumina TruSeq Stranded mRNA  
484 Library Prep protocol with unique indexes for each sample. Single-end 100-bp sequencing was  
485 performed on a HiSeq 4000 at the iGE3 platform in Geneva, Switzerland. RNA-seq reads were first  
486 filtered using Trimmomatic v0.38 (Bolger *et al.* 2014) using the following parameters:  
487 ILLUMINACLIP:TruSeq3-SE.fa: 2:30:10 LEADING:10 TRAILING:10 SLIDINGWINDOW:5:10  
488 MINLEN: 50, and then aligned to the corresponding genome assembly using STAR v2.6.0a (Dobin *et*  
489 *al.* 2013) allowing for multiple read mapping (parameters set as --outFilterMultimapNmax 100 --  
490 winAnchorMultimapNmax 200 --outFilterMismatchNmax 3). We used HTSeq-count v0.11.2 (Anders  
491 *et al.* 2015) with -s reverse and -m union parameters to recover counts per feature (joint counting of  
492 reads in genes and TEs). We calculated normalized feature counts expressed as counts per million  
493 using the EdgeR package v3.24.3 (Robinson *et al.* 2010). We restricted our analyses to features with a  
494 count per million >1.

495

#### 496 **Gene prediction and genome annotation**

497 We used the gene prediction pipeline BRAKER v2.1 to predict genes in the 14 newly assembled  
498 genomes (Altschul *et al.* 1990; Stanke *et al.* 2006, 2008; Camacho *et al.* 2009; Li *et al.* 2009; Barnett  
499 *et al.* 2011; Lomsadze *et al.* 2014; Hoff *et al.* 2016). BRAKER combines coding sequence and intron  
500 hints based on the mapping of conserved protein sequences and introns identified in RNA-seq data,  
501 respectively. The above described RNA-seq datasets were joined with predicted protein sequences  
502 from the reference isolate IPO323 (Goodwin *et al.* 2011) and used to predict gene features and guide  
503 splice site mapping. RNA alignment files were generated with HISAT2 v2.1.0 using the --rna-  
504 strandness R option (Kim *et al.* 2015). The resulting bam files were provided to BRAKER (--bam

505 option) together with mapped IPO323 reference proteins (--prot\_seq option) to generate gene  
506 predictions for each assembled genome using the --alternatives-from-evidence=false --prg=gth --  
507 etpmode --fungus parameters. Orthologous genes were identified using protein sequences from all 19  
508 isolates and Orthofinder v2.1.2 with default parameters (Emms & Kelly 2015, 2019).

509

#### 510 **TE consensus identification, classification and annotation**

511 To obtain consensus sequences for TE families, individual runs of RepeatModeler were performed on  
512 the 19 complete genomes in addition to the genome of *Z. pseudotritici* (REF Stukenbrock et al 2010  
513 PLOS Genetics). The classification was based on the GIRI Repbase using RepeatMasker (Bao *et al.*  
514 2015; Smit, AFA, Hubley, R & Green 2015). In order to finalize the classification of TE consensus  
515 sequences, we used WICKERsoft (Breen *et al.* 2010). The 19 complete genomes were screened for  
516 copies of consensus sequences with blastn filtering for sequence identity of > 80% on >80% of the  
517 length of the sequence (Altschul *et al.* 1997). Flanks of 300 bp were added and new multiple sequence  
518 alignments were performed using ClustalW (G Higgins & M Sharp 1988). Boundaries were visually  
519 inspected and trimmed if necessary. Consensus sequences were classified according to the presence  
520 and type of terminal repeats and homology of encoded proteins using hints from blastx on NCBI.  
521 Consensus sequences were renamed according to a three-letter classification system (Wicker *et al.*  
522 2007).

523

524 A second round of annotation was performed based on predicted protein sequences of TE  
525 superfamilies from other fungal species. Here again, the 19 complete genomes were screened for a  
526 protein sequence of each superfamily using tblastn. Blast hits were filtered for a minimal alignment  
527 size of 80 bp and sequence similarity >35%. Flanks of 3'000 bp or more both up and downstream of  
528 the sequence were then added. Hits were pairwise compared with dotplots using dotter and grouped  
529 into families based on visual inspection (Sonnhammer & Durbin 1995). Finally, multiple sequence  
530 alignments were performed with ClustalW to construct consensus sequences and the consensus  
531 sequences were renamed according to the three-letter system (Wicker *et al.* 2007).

532

533 A third round of annotation of the 19 complete genomes was done to identify four groups of short  
534 non-autonomous TEs. LTR-Finder was used to screen for LARDs (LArge Retrotransposon Derivates)  
535 and TRIMs (Terminal Repeat retrotransposons In Miniature) with the filters -d 2001 -D 6000 -l 30 -L  
536 5000 and -d 30 -D 2000 -l 30 -L 500 respectively. MITE-Tracker was used to screen for MITEs  
537 (Miniature Inverted-repeat Transposable Elements) and SINE-Finder in Sine-Scan to screen for  
538 SINEs (Short Interspersed Nuclear Elements) (Xu & Wang 2007; Wenke *et al.* 2011; Ma *et al.* 2015;  
539 Gao *et al.* 2016; Mao & Wang 2017; Crescente *et al.* 2018). For each detected LARD, TRIM and  
540 SINE, consensus sequences were created as described above and duplicates excluded. All genome  
541 assemblies were then annotated with the curated consensus sequences using RepeatMasker with a cut-  
542 off value of 250 and ignored simple repeats as well as low complexity regions. Annotated elements  
543 shorter than 100 bp were filtered out, and adjacent identical TEs overlapping by more than 100 bp  
544 were merged. Different TE families overlapping by more than 100 bp were considered as *nested*  
545 insertions and were renamed accordingly. Identical elements separated by less than 200 bp indicative  
546 of putative interrupted elements were grouped into a single element using minimal start and maximal  
547 stop positions. TEs overlapping  $\geq 1$  bp with genes were recovered using the *bedtools* v2.27.1 suite and  
548 the *overlap* function (Quinlan & Hall 2010). Correlations were calculated in RStudio version 1.1.453  
549 using Spearman's coefficient for pairwise complete observations and statistics were inferred with the  
550 *psych* package using the Holm correction method (Revelle 2017).

551

## 552 **Functional annotation of predicted genes**

553 Protein functions were predicted for all gene models using InterProScan v 5.31-70.0 (Jones *et al.*  
554 2014) adding -goterms -iprlookup and -pathway information. Secretion peptides and transmembrane  
555 domains (TM) were identified using SignalP v 4.1 and Phobius (Käll *et al.* 2004; Petersen *et al.*  
556 2011). The secretome was defined as the set of proteins with a signal peptide but no TM as predicted  
557 by either SignalP and Phobius. Putative effectors were identified with EffectorP v 2.0 with default  
558 parameters using the set of predicted secreted proteins (Sperschneider *et al.* 2016). Carbohydrate-  
559 active enzymes (CAZymes) were identified using dbCAN2 release 7.0 server (Lombard *et al.* 2014;  
560 Zhang *et al.* 2018) with the three tools HMMER, DIAMOND and Hotpep (Finn *et al.* 2011; Buchfink

561 *et al.* 2015; Busk *et al.* 2017). Proteins were classified as a CAZyme if predicted by each of the three  
562 tools. We searched for secondary metabolite gene clusters using the online version 4 of antiSMASH  
563 (Blin *et al.* 2017). Genes belonging to an identified cluster were annotated as “biosynthetic”,  
564 “biosynthetic-additional”, “transport”, “regulatory” or “other”. Gene clusters mapping at a conserved,  
565 orthologous locus shared by two or more isolate were considered as syntenic.

566

## 567 **Declarations**

568 *Ethics approval and consent to participate:* n/a

569 *Consent for publication:* n/a

570 *Availability of data and materials:* The genome assembly and annotation for new genome assemblies  
571 are available at the European Nucleotide Archive (<http://www.ebi.ac.uk/ena>) under accession number  
572 PRJEB33986. The RNA-sequencing raw sequencing data was deposited at the NCBI Short Read  
573 Archive under the accession number PRJNA559981.

574 *Competing interests:* none

575 *Funding:* BAM and DC received support from the Swiss National Science Foundation (grants  
576 31003A\_155955 and 31003A\_173265, respectively). DC was also supported by a grant from the  
577 Fondation Pierre Mercier pour la Science for this work.

578 *Authors' contributions:* TB and DC conceived the study; TB and UO performed analyses; LA and  
579 BAM provided datasets and strains; BAM and DC provided funding; TB and DC wrote the  
580 manuscript.

581 *Acknowledgements:* We are grateful for helpful comments by Simone Fouché on a previous version of  
582 this manuscript. Data generated for this manuscript was obtained in collaboration with the Genetic  
583 Diversity Centre (GDC), ETH Zurich and the Functional Genomics Center Zurich (FGCZ).

584

585

## 586 **References**

587 Altschul, S.F., Gish, W., Miller, W., Myers, E.W. & Lipman, D.J. (1990). Basic local alignment  
588 search tool. *J. Mol. Biol.*, 215, 403–10.

- 589 Altschul, S.F., Madden, T.L., Schäffer, A.A., Zhang, J., Zhang, Z., Miller, W., *et al.* (1997). Gapped  
590 BLAST and PSI-BLAST: a new generation of protein database search programs. *Nucleic Acids*  
591 *Res.*, 25, 3389–3402.
- 592 Anders, S., Pyl, P.T. & Huber, W. (2015). HTSeq—a Python framework to work with high-throughput  
593 sequencing data. *Bioinformatics*, 31, 166–9.
- 594 Araki, H., Tian, D., Goss, E.M., Jakob, K., Halldorsdottir, S.S., Kreitman, M., *et al.* (2006).  
595 Presence/absence polymorphism for alternative pathogenicity islands in *Pseudomonas*  
596 *viridiflava*, a pathogen of *Arabidopsis*. *Pnas*, 103, 5887–5892.
- 597 Bao, W., Kojima, K.K. & Kohany, O. (2015). Repbase Update, a database of repetitive elements in  
598 eukaryotic genomes. *Mob. DNA*, 6, 11.
- 599 Barnett, D.W., Garrison, E.K., Quinlan, A.R., Stromberg, M.P. & Marth, G.T. (2011). BamTools: a  
600 C++ API and toolkit for analyzing and managing BAM files. *Bioinformatics*, 27, 1691–1692.
- 601 Beck, C.R., Garcia-Perez, J.L., Badge, R.M. & Moran, J. V. (2011). LINE-1 Elements in Structural  
602 Variation and Disease. *Annu. Rev. Genomics Hum. Genet.*, 12, 187–215.
- 603 Blake, J.J., Gosling, P., Fraaije, B.A., Burnett, F.J., Knight, S.M., Kildea, S., *et al.* (2018). Changes in  
604 field dose-response curves for demethylation inhibitor (DMI) and quinone outside inhibitor  
605 (QoI) fungicides against *Zymoseptoria tritici*, related to laboratory sensitivity phenotyping and  
606 genotyping assays. *Pest Manag. Sci.*, 74, 302–313.
- 607 Blin, K., Wolf, T., Chevrette, M.G., Lu, X., Schwalen, C.J., Kautsar, S.A., *et al.* (2017). antiSMASH  
608 4.0-improvements in chemistry prediction and gene cluster boundary identification. *Nucleic*  
609 *Acids Res.*, 45, W36–W41.
- 610 Bolger, A.M., Lohse, M. & Usadel, B. (2014). Trimmomatic: a flexible trimmer for Illumina  
611 sequence data. *Bioinformatics*, 30, 2114–20.
- 612 Breen, J., Wicker, T., Kong, X., Zhang, J., Ma, W., Paux, E., *et al.* (2010). A highly conserved gene  
613 island of three genes on chromosome 3B of hexaploid wheat: diverse gene function and genomic  
614 structure maintained in a tightly linked block. *BMC Plant Biol.*, 10, 98.
- 615 Brown, J.K.M., Chartrain, L., Lasserre-Zuber, P. & Saintenac, C. (2015). Genetics of resistance to  
616 *Zymoseptoria tritici* and applications to wheat breeding. *Fungal Genet. Biol.*, 79, 33–41.

- 617 Brynildsrud, O., Gulla, S., Feil, E.J., Nørstebø, S.F. & Rhodes, L.D. (2016). Identifying copy number  
618 variation of the dominant virulence factors msa and p22 within genomes of the fish pathogen  
619 *Renibacterium salmoninarum*. *Microb. genomics*, 2, e000055.
- 620 Buchfink, B., Xie, C. & Huson, D.H. (2015). Fast and sensitive protein alignment using DIAMOND.  
621 *Nat. Methods*, 12, 59–60.
- 622 Busk, P.K., Pilgaard, B., Lezyk, M.J., Meyer, A.S. & Lange, L. (2017). Homology to peptide pattern  
623 for annotation of carbohydrate-active enzymes and prediction of function. *BMC Bioinformatics*,  
624 18, 214.
- 625 Calvo, A.M., Wilson, R.A., Bok, J.W. & Keller, N.P. (2002). Relationship between secondary  
626 metabolism and fungal development. *Microbiol. Mol. Biol. Rev.*, 66, 447–59, table of contents.
- 627 Camacho, C., Coulouris, G., Avagyan, V., Ma, N., Papadopoulos, J., Bealer, K., *et al.* (2009).  
628 BLAST+: architecture and applications. *BMC Bioinformatics*, 10, 421.
- 629 Cools, H.J. & Fraaije, B.A. (2008). Are azole fungicides losing ground against *Septoria* wheat  
630 disease? Resistance mechanisms in *Mycosphaerella graminicola*. *Pest Manag. Sci.*, 64, 681–684.
- 631 Crescente, J.M., Zavallo, D., Helguera, M. & Vanzetti, L.S. (2018). MITE Tracker: an accurate  
632 approach to identify miniature inverted-repeat transposable elements in large genomes. *BMC*  
633 *Bioinformatics*, 19, 348.
- 634 Croll, D., Lendenmann, M.H., Stewart, E. & McDonald, B.A. (2015). The impact of recombination  
635 hotspots on genome evolution of a fungal plant pathogen. *Genetics*, 201, 1213–1228.
- 636 Croll, D., Zala, M., McDonald, B.A., Smoot, M. & Shumway, M. (2013). Breakage-fusion-bridge  
637 Cycles and Large Insertions Contribute to the Rapid Evolution of Accessory Chromosomes in a  
638 Fungal Pathogen. *PLoS Genet.*, 9, e1003567.
- 639 Dobin, A., Davis, C.A., Schlesinger, F., Drenkow, J., Zaleski, C., Jha, S., *et al.* (2013). STAR:  
640 ultrafast universal RNA-seq aligner. *Bioinformatics*, 29, 15–21.
- 641 Dong, S., Raffaele, S. & Kamoun, S. (2015). The two-speed genomes of filamentous pathogens: waltz  
642 with plants. *Curr. Opin. Genet. Dev.*, 35, 57–65.
- 643 Emms, D.M. & Kelly, S. (2015). OrthoFinder: solving fundamental biases in whole genome  
644 comparisons dramatically improves orthogroup inference accuracy. *Genome Biol.*, 16, 157.

- 645 Emms, D.M. & Kelly, S. (2019). OrthoFinder: phylogenetic orthology inference for comparative  
646 genomics. *bioRxiv*, 466201.
- 647 Faino, L., Seidl, M.F., Shi-Kunne, X., Pauper, M., Van Den Berg, G.C.M., Wittenberg, A.H.J., *et al.*  
648 (2016). Transposons passively and actively contribute to evolution of the two-speed genome of a  
649 fungal pathogen. *Genome Res.*, 26, 1091–1100.
- 650 Finn, R.D., Clements, J. & Eddy, S.R. (2011). HMMER web server: interactive sequence similarity  
651 searching. *Nucleic Acids Res.*, 39, W29-37.
- 652 Fouché, S., Badet, T., Oggenfuss, U., Plissonneau, C., Francisco, C.S. & Croll, D. (2019a). Stress-  
653 driven transposable element de-repression dynamics and virulence evolution in a fungal  
654 pathogen. *Mol. Biol. Evol.*
- 655 Fouché, S., Badet, T., Oggenfuss, U., Plissonneau, C., Francisco, C.S. & Croll, D. (2019b). Stress-  
656 driven transposable element de-repression dynamics in a fungal pathogen. *bioRxiv*, 633693.
- 657 Fouché, S., Plissonneau, C. & Croll, D. (2018a). The birth and death of effectors in rapidly evolving  
658 filamentous pathogen genomes. *Curr. Opin. Microbiol.*, 46, 34–42.
- 659 Fouché, S., Plissonneau, C., McDonald, B.A. & Croll, D. (2018b). Meiosis Leads to Pervasive Copy-  
660 Number Variation and Distorted Inheritance of Accessory Chromosomes of the Wheat Pathogen  
661 *Zymoseptoria tritici*. *Genome Biol. Evol.*, 10, 1416–1429.
- 662 Francisco, C.S., Ma, X., Zwyssig, M.M., McDonald, B.A. & Palma-Guerrero, J. (2019).  
663 Morphological changes in response to environmental stresses in the fungal plant pathogen  
664 *Zymoseptoria tritici*. *Sci. Rep.*, 9, 9642.
- 665 G Higgins, D. & M Sharp, P. (1988). CLUSTAL: a package for performing multiple sequence  
666 alignment on a microcomputer. *Gene*, 73, 237–244.
- 667 Galagan, J.E. & Selker, E.U. (2004). RIP: the evolutionary cost of genome defense. *Trends Genet.*,  
668 20, 417–23.
- 669 Gao, D., Li, Y., Kim, K. Do, Abernathy, B. & Jackson, S.A. (2016). Landscape and evolutionary  
670 dynamics of terminal repeat retrotransposons in miniature in plant genomes. *Genome Biol.*, 17,  
671 7.
- 672 Goodwin, S.B., Ben M'Barek, S., Dhillon, B., Wittenberg, A.H.J., Crane, C.F., Hane, J.K., *et al.*

- 673 (2011). Finished Genome of the Fungal Wheat Pathogen *Mycosphaerella graminicola* Reveals  
674 Dispensome Structure, Chromosome Plasticity, and Stealth Pathogenesis. *PLoS Genet.*, 7,  
675 e1002070.
- 676 Grandaubert, J., Dutheil, J.Y. & Stukenbrock, E.H. (2019). The genomic determinants of adaptive  
677 evolution in a fungal pathogen. *Evol. Lett.*, 3, 299–312.
- 678 Hartmann, F.E. & Croll, D. (2017). Distinct Trajectories of Massive Recent Gene Gains and Losses in  
679 Populations of a Microbial Eukaryotic Pathogen. *Mol. Biol. Evol.*, 127, 1–18.
- 680 Hartmann, F.E., Rodríguez de la Vega, R.C., Brandenburg, J.-T., Carpentier, F. & Giraud, T. (2018).  
681 Gene Presence–Absence Polymorphism in Castrating Anther-Smut Fungi: Recent Gene Gains  
682 and Phylogeographic Structure. *Genome Biol. Evol.*, 10, 1298–1314.
- 683 Hartmann, F.E., Sánchez-Vallet, A., McDonald, B.A. & Croll, D. (2017). A fungal wheat pathogen  
684 evolved host specialization by extensive chromosomal rearrangements. *ISME J.*, 11, 1189–1204.
- 685 Hirsch, C.N., Foerster, J.M., Johnson, J.M., Sekhon, R.S., Muttoni, G., Vaillancourt, B., *et al.* (2014).  
686 Insights into the maize pan-genome and pan-transcriptome. *Plant Cell*, 26, 121–35.
- 687 Hoff, K.J., Lange, S., Lomsadze, A., Borodovsky, M. & Stanke, M. (2016). BRAKER1:  
688 Unsupervised RNA-Seq-Based Genome Annotation with GeneMark-ET and AUGUSTUS:  
689 Table 1. *Bioinformatics*, 32, 767–769.
- 690 Jackson, R.W., Vinatzer, B., Arnold, D.L., Dorus, S. & Murillo, J. (2011). The influence of the  
691 accessory genome on bacterial pathogen evolution. *Mob. Genet. Elements*, 1, 55–65.
- 692 Jones, J.D.G. & Dangl, J.L. (2006). The plant immune system. *Nature*, 444, 323–9.
- 693 Jones, P., Binns, D., Chang, H.-Y., Fraser, M., Li, W., McAnulla, C., *et al.* (2014). InterProScan 5:  
694 genome-scale protein function classification. *Bioinformatics*, 30, 1236–40.
- 695 Käll, L., Krogh, A. & Sonnhammer, E.L.. (2004). A Combined Transmembrane Topology and Signal  
696 Peptide Prediction Method. *J. Mol. Biol.*, 338, 1027–1036.
- 697 Kim, D., Langmead, B. & Salzberg, S.L. (2015). HISAT: a fast spliced aligner with low memory  
698 requirements. *Nat. Methods*, 12, 357–360.
- 699 Kim, S., Mun, S., Kim, T., Lee, K.-H., Kang, K., Cho, J.-Y., *et al.* (2019). Transposable element-  
700 mediated structural variation analysis in dog breeds using whole-genome sequencing. *Mamm.*



- 701           *Genome*.
- 702   Kjærboelling, I., Vesth, T.C., Frisvad, J.C., Nybo, J.L., Theobald, S., Kuo, A., *et al.* (2018). Linking  
703           secondary metabolites to gene clusters through genome sequencing of six diverse *Aspergillus*  
704           species. *Proc. Natl. Acad. Sci. U. S. A.*, 115, E753–E761.
- 705   Kolmogorov, M., Raney, B., Paten, B. & Pham, S. (2014). Ragout-a reference-assisted assembly tool  
706           for bacterial genomes. *Bioinformatics*, 30, i302-9.
- 707   Koren, S., Walenz, B.P., Berlin, K., Miller, J.R., Bergman, N.H. & Phillippy, A.M. (2017). Canu:  
708           scalable and accurate long-read assembly via adaptive k-mer weighting and repeat separation.  
709           *Genome Res.*, 27, 722–736.
- 710   Krishnan, P., Meile, L., Plissonneau, C., Ma, X., Hartmann, F.E., Croll, D., *et al.* (2018).  
711           Transposable element insertions shape gene regulation and melanin production in a fungal  
712           pathogen of wheat. *BMC Biol.*, 16, 78.
- 713   Lefébure, T., Pavinski Bitar, P.D., Suzuki, H. & Stanhope, M.J. (2010). Evolutionary Dynamics of  
714           Complete *Campylobacter* Pan-Genomes and the Bacterial Species Concept. *Genome Biol. Evol.*,  
715           2, 646–655.
- 716   Li, H., Handsaker, B., Wysoker, A., Fennell, T., Ruan, J., Homer, N., *et al.* (2009). The Sequence  
717           Alignment/Map format and SAMtools. *Bioinformatics*, 25, 2078–2079.
- 718   Lombard, V., Golaconda Ramulu, H., Drula, E., Coutinho, P.M. & Henrissat, B. (2014). The  
719           carbohydrate-active enzymes database (CAZy) in 2013. *Nucleic Acids Res.*, 42, D490-5.
- 720   Lomsadze, A., Burns, P.D. & Borodovsky, M. (2014). Integration of mapped RNA-Seq reads into  
721           automatic training of eukaryotic gene finding algorithm. *Nucleic Acids Res.*, 42, e119–e119.
- 722   Lucas, J.A., Hawkins, N.J. & Fraaije, B.A. (2015). The Evolution of Fungicide Resistance. In:  
723           *Advances in applied microbiology*. pp. 29–92.
- 724   Lyu, X., Shen, C., Fu, Y., Xie, J., Jiang, D., Li, G., *et al.* (2015). Comparative genomic and  
725           transcriptional analyses of the carbohydrate-active enzymes and secretomes of phytopathogenic  
726           fungi reveal their significant roles during infection and development. *Sci. Rep.*, 5, 15565.
- 727   Ma, B., Li, T., Xiang, Z. & He, N. (2015). MnTEdb, a collective resource for mulberry transposable  
728           elements. *Database*, 2015.

- 729 Mao, H. & Wang, H. (2017). SINE\_scan: an efficient tool to discover short interspersed nuclear  
730 elements (SINEs) in large-scale genomic datasets. *Bioinformatics*, 33, btw718.
- 731 Marschall, T., Marz, M., Abeel, T., Dijkstra, L., Dutilh, B.E., Ghaffaari, A., *et al.* (2016).  
732 Computational pan-genomics: status, promises and challenges. *Brief. Bioinform.*, 19, bbw089.
- 733 McCarthy, C.G.P. & Fitzpatrick, D.A. (2019). Pan-genome analyses of model fungal species. *Microb.*  
734 *genomics*, 5.
- 735 McInerney, J.O., McNally, A. & O'Connell, M.J. (2017). Why prokaryotes have pangenomes. *Nat.*  
736 *Microbiol.*, 2, 17040.
- 737 Meile, L., Croll, D., Brunner, P.C., Plissonneau, C., Hartmann, F.E., McDonald, B.A., *et al.* (2018). A  
738 fungal avirulence factor encoded in a highly plastic genomic region triggers partial resistance to  
739 septoria tritici blotch. *New Phytol.*, 219, 1048–1061.
- 740 Metzenberg, R.L. (2003). Vogel's Medium N salts: avoiding the need for ammonium nitrate. *Fungal*  
741 *Genet. Rep.*, 50, 14–14.
- 742 Naville, M., Henriot, S., Warren, I., Sumic, S., Reeve, M., Volf, J.-N., *et al.* (2019). Massive  
743 Changes of Genome Size Driven by Expansions of Non-autonomous Transposable Elements.  
744 *Curr. Biol.*, 29, 1161-1168.e6.
- 745 Omrane, S., Audéon, C., Ignace, A., Duplaix, C., Aouini, L., Kema, G., *et al.* (2017). Plasticity of the  
746 MFS1 Promoter Leads to Multidrug Resistance in the Wheat Pathogen *Zymoseptoria tritici*.  
747 *mSphere*, 2, e00393-17.
- 748 Palma-Guerrero, J., Ma, X., Torriani, S.F.F., Zala, M., Francisco, C.S., Hartmann, F.E., *et al.* (2017).  
749 Comparative Transcriptome Analyses in *Zymoseptoria tritici* Reveal Significant Differences in  
750 Gene Expression Among Strains During Plant Infection. *Mol. Plant-Microbe Interact.*, 30, 231–  
751 244.
- 752 Petersen, T.N., Brunak, S., von Heijne, G. & Nielsen, H. (2011). SignalP 4.0: discriminating signal  
753 peptides from transmembrane regions. *Nat. Methods*, 8, 785–786.
- 754 Plissonneau, C., Daverdin, G., Ollivier, B., Blaise, F., Degrave, A., Fudal, I., *et al.* (2016a). A game  
755 of hide and seek between avirulence genes *AvrLm4-7* and *AvrLm3* in *Leptosphaeria maculans*.  
756 *New Phytol.*, 209, 1613–1624.

- 757 Plissonneau, C., Hartmann, F.E. & Croll, D. (2018). Pangenome analyses of the wheat pathogen  
758 *Zymoseptoria tritici* reveal the structural basis of a highly plastic eukaryotic genome. *BMC Biol.*,  
759 16, 5.
- 760 Plissonneau, C., Stürchler, A. & Croll, D. (2016b). The Evolution of Orphan Regions in Genomes of a  
761 Fungal Pathogen of Wheat. *MBio*, 7, e01231-16.
- 762 Lo Presti, L., Lanver, D., Schweizer, G., Tanaka, S., Liang, L., Tollot, M., *et al.* (2015). Fungal  
763 Effectors and Plant Susceptibility. *Annu. Rev. Plant Biol.*, 66, 513–545.
- 764 Pusztahelyi, T., Holb, I.J. & Pócsi, I. (2015). Secondary metabolites in fungus-plant interactions.  
765 *Front. Plant Sci.*, 6, 573.
- 766 Quinlan, A.R. & Hall, I.M. (2010). BEDTools: a flexible suite of utilities for comparing genomic  
767 features. *Bioinformatics*, 26, 841–842.
- 768 Raffa, N. & Keller, N.P. (2019). A call to arms: Mustering secondary metabolites for success and  
769 survival of an opportunistic pathogen. *PLOS Pathog.*, 15, e1007606.
- 770 Ramasamy, D., Mishra, A.K., Lagier, J.-C., Padhmanabhan, R., Rossi, M., Sentausa, E., *et al.* (2014).  
771 A polyphasic strategy incorporating genomic data for the taxonomic description of novel  
772 bacterial species. *Int. J. Syst. Evol. Microbiol.*, 64, 384–391.
- 773 Revelle, W.R. (2017). *psych: Procedures for Personality and Psychological Research*.
- 774 Robinson, M.D., McCarthy, D.J. & Smyth, G.K. (2010). edgeR: a Bioconductor package for  
775 differential expression analysis of digital gene expression data. *Bioinformatics*, 26, 139.
- 776 Rouli, L., Merhej, V., Fournier, P.-E. & Raoult, D. (2015). The bacterial pangenome as a new tool for  
777 analysing pathogenic bacteria. *New microbes new Infect.*, 7, 72–85.
- 778 Sánchez-Vallet, A., Fouché, S., Fudal, I., Hartmann, F.E., Soyer, J.L., Tellier, A., *et al.* (2018a). The  
779 Genome Biology of Effector Gene Evolution in Filamentous Plant Pathogens. *Annu. Rev.*  
780 *Phytopathol.*, 56, 21–40.
- 781 Sánchez-Vallet, A., Hartmann, F.E., Marcel, T.C. & Croll, D. (2018b). Nature’s genetic screens:  
782 using genome-wide association studies for effector discovery. *Mol. Plant Pathol.*, 19, 3–6.
- 783 Schotanus, K., Soyer, J.L., Connolly, L.R., Grandaubert, J., Happel, P., Smith, K.M., *et al.* (2015).  
784 Histone modifications rather than the novel regional centromeres of *Zymoseptoria tritici*

- 785 distinguish core and accessory chromosomes. *Epigenetics Chromatin*, 8, 41.
- 786 Schrider, D.R. & Hahn, M.W. (2010). Gene copy-number polymorphism in nature. *Proc. R. Soc. B*
- 787 *Biol. Sci.*, 277, 3213–3221.
- 788 Selker, E.U. (2002). Repeat-Induced Gene Silencing in Fungi. *Adv. Genet.*, 46, 439–450.
- 789 Smit, AFA, Hubley, R & Green, P. (2015). RepeatMasker Open-4.0.
- 790 Sonnhammer, E.L.L. & Durbin, R. (1995). A dot-matrix program with dynamic threshold control
- 791 suited for genomic DNA and protein sequence analysis. *Gene*, 167, Gc1–Gc10.
- 792 Sperschneider, J., Gardiner, D.M., Dodds, P.N., Tini, F., Covarelli, L., Singh, K.B., *et al.* (2016).
- 793 Effector P: predicting fungal effector proteins from secretomes using machine learning. *New*
- 794 *Phytol.*, 210, 743–761.
- 795 Sperschneider, J., Gardiner, D.M., Thatcher, L.F., Lyons, R., Singh, K.B., Manners, J.M., *et al.*
- 796 (2015). Genome-Wide Analysis in Three Fusarium Pathogens Identifies Rapidly Evolving
- 797 Chromosomes and Genes Associated with Pathogenicity. *Genome Biol. Evol.*, 7, 1613–27.
- 798 Stanke, M., Diekhans, M., Baertsch, R. & Haussler, D. (2008). Using native and syntenically mapped
- 799 cDNA alignments to improve de novo gene finding. *Bioinformatics*, 24, 637–644.
- 800 Stanke, M., Schöffmann, O., Morgenstern, B. & Waack, S. (2006). Gene prediction in eukaryotes
- 801 with a generalized hidden Markov model that uses hints from external sources. *BMC*
- 802 *Bioinformatics*, 7, 62.
- 803 Steinberg, G. (2015). Cell biology of *Zymoseptoria tritici*: Pathogen cell organization and wheat
- 804 infection. *Fungal Genet. Biol.*, 79, 17–23.
- 805 Steinhauer, D., Salat, M., Frey, R., Mosbach, A., Luksch, T., Balmer, D., *et al.* (2019). A dispensable
- 806 paralog of succinate dehydrogenase subunit C mediates standing resistance towards a subclass
- 807 of SDHI fungicides in *Zymoseptoria tritici*. *bioRxiv*, 616904.
- 808 Stukenbrock, E.H. & Dutheil, J.Y. (2018). Fine-Scale Recombination Maps of Fungal Plant
- 809 Pathogens Reveal Dynamic Recombination Landscapes and Intragenic Hotspots. *Genetics*, 208,
- 810 1209–1229.
- 811 Tettelin, H., Riley, D., Cattuto, C. & Medini, D. (2008). Comparative genomics: the bacterial pan-
- 812 genome. *Curr. Opin. Microbiol.*, 11, 472–7.

- 813 Toruño, T.Y., Stergiopoulos, I. & Coaker, G. (2016). Plant-Pathogen Effectors: Cellular Probes  
814 Interfering with Plant Defenses in Spatial and Temporal Manners. *Annu. Rev. Phytopathol.*, 54,  
815 419–441.
- 816 Wenke, T., Dobel, T., Sorensen, T.R., Junghans, H., Weisshaar, B. & Schmidt, T. (2011). Targeted  
817 Identification of Short Interspersed Nuclear Element Families Shows Their Widespread  
818 Existence and Extreme Heterogeneity in Plant Genomes. *Plant Cell Online*, 23, 3117–3128.
- 819 Wicker, T., Sabot, F., Hua-Van, A., Bennetzen, J.L., Capy, P., Chalhoub, B., *et al.* (2007). A unified  
820 classification system for eukaryotic transposable elements. *Nat. Rev. Genet.*, 8, 973–982.
- 821 Wit De, P.J.G.M., Mehrabi, R., Burg Van den, H.A. & Stergiopoulos, I. (2009). Fungal effector  
822 proteins: past, present and future. *Mol. Plant Pathol.*, 10, 735–47.
- 823 Wu, Y., Zaiden, N. & Cao, B. (2018). The Core- and Pan-Genomic Analyses of the Genus  
824 *Comamonas*: From Environmental Adaptation to Potential Virulence. *Front. Microbiol.*, 9,  
825 3096.
- 826 Xu, Z. & Wang, H. (2007). LTR-FINDER: An efficient tool for the prediction of full-length LTR  
827 retrotransposons. *Nucleic Acids Res.*, 35, 265–268.
- 828 Yoshida, K., Saunders, D.G.O., Mitsuoka, C., Natsume, S., Kosugi, S., Saitoh, H., *et al.* (2016). Host  
829 specialization of the blast fungus *Magnaporthe oryzae* is associated with dynamic gain and loss  
830 of genes linked to transposable elements. *BMC Genomics*, 17, 370.
- 831 Yue, J.-X. & Liti, G. (2018). Long-read sequencing data analysis for yeasts. *Nat. Protoc.*, 13, 1213–  
832 1231.
- 833 Zerillo, M.M., Adhikari, B.N., Hamilton, J.P., Buell, C.R., Lévesque, C.A. & Tisserat, N. (2013).  
834 Carbohydrate-Active Enzymes in *Pythium* and Their Role in Plant Cell Wall and Storage  
835 Polysaccharide Degradation. *PLoS One*, 8, e72572.
- 836 Zhan, J., Linde, C.C., Jurgens, T., Merz, U., Steinebrunner, F. & McDonald, B.A. (2005). Variation  
837 for neutral markers is correlated with variation for quantitative traits in the plant pathogenic  
838 fungus *Mycosphaerella graminicola*. *Mol. Ecol.*, 14, 2683–2693.
- 839 Zhang, H., Yohe, T., Huang, L., Entwistle, S., Wu, P., Yang, Z., *et al.* (2018). dbCAN2: a meta server  
840 for automated carbohydrate-active enzyme annotation. *Nucleic Acids Res.*, 46, W95–W101.

- 841 Zhao, Q., Feng, Q., Lu, H., Li, Y., Wang, A., Tian, Q., *et al.* (2018). Pan-genome analysis highlights  
842 the extent of genomic variation in cultivated and wild rice. *Nat. Genet.*, 50, 278–284.
- 843 Zhao, Z., Liu, H., Wang, C. & Xu, J.-R. (2013). Comparative analysis of fungal genomes reveals  
844 different plant cell wall degrading capacity in fungi. *BMC Genomics*, 14, 274.
- 845 Zhou, P., Silverstein, K.A.T., Ramaraj, T., Guhlin, J., Denny, R., Liu, J., *et al.* (2017). Exploring  
846 structural variation and gene family architecture with De Novo assemblies of 15 Medicago  
847 genomes. *BMC Genomics*, 18, 261.
- 848



**A**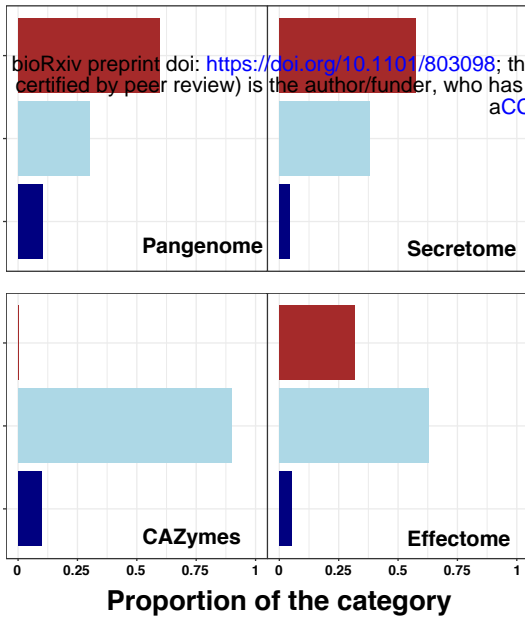**B**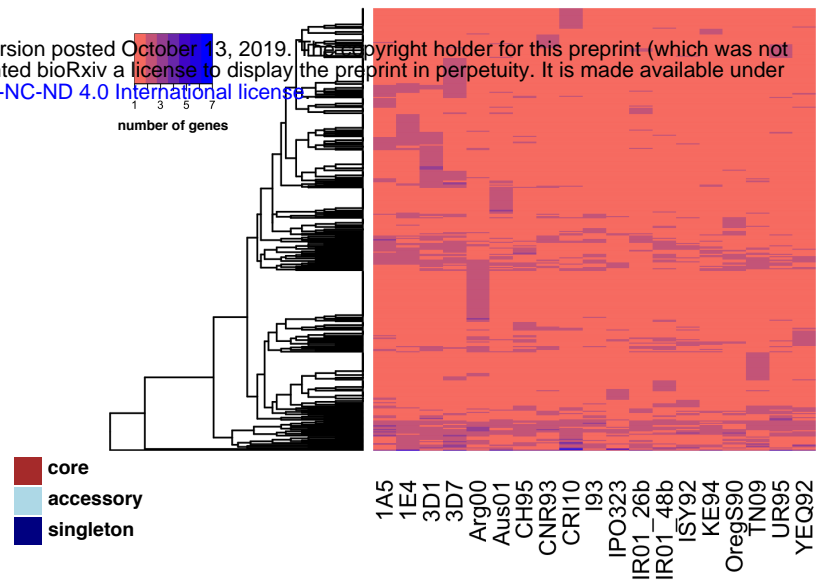**C**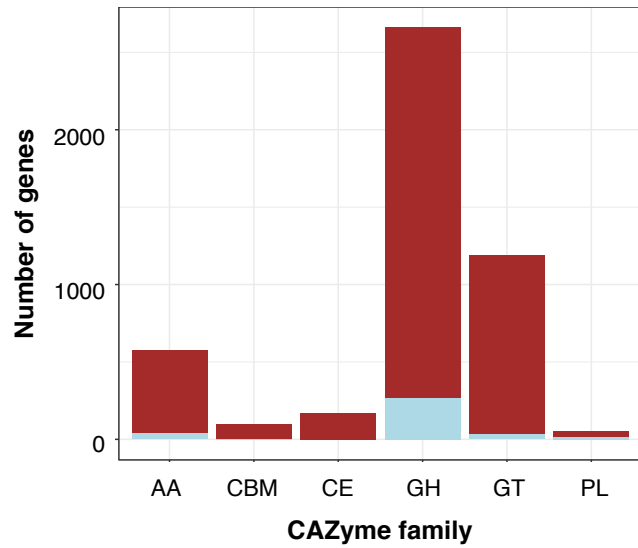**D**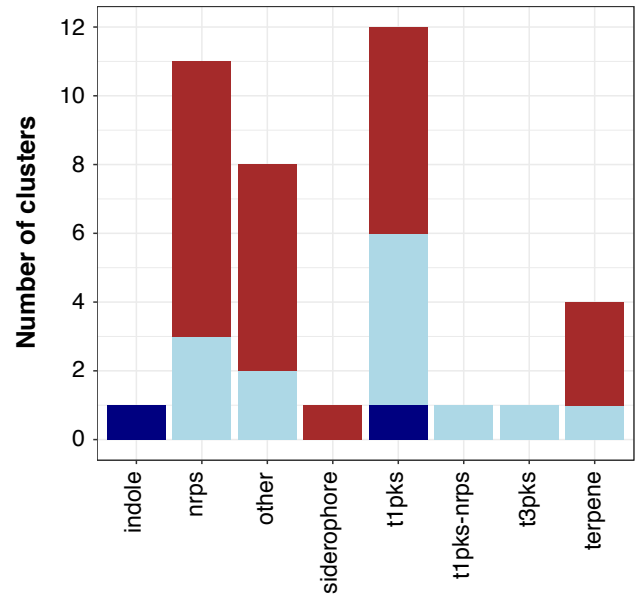**E**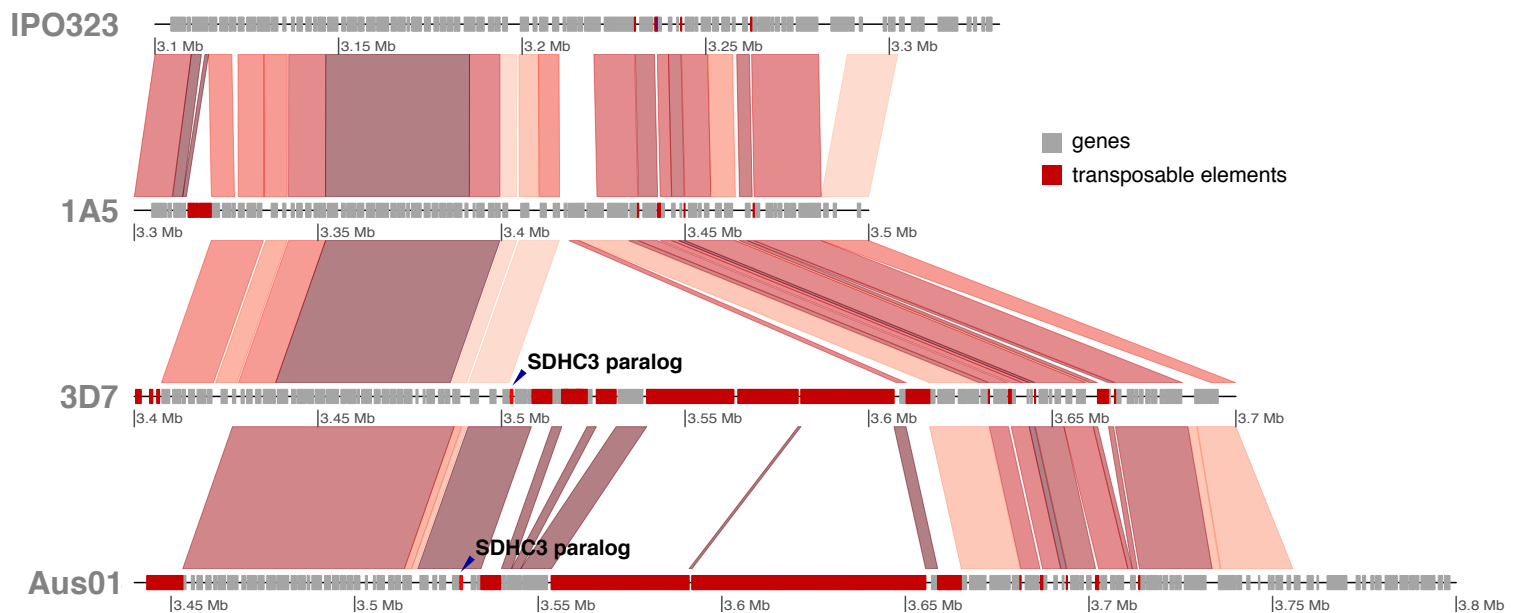



**A**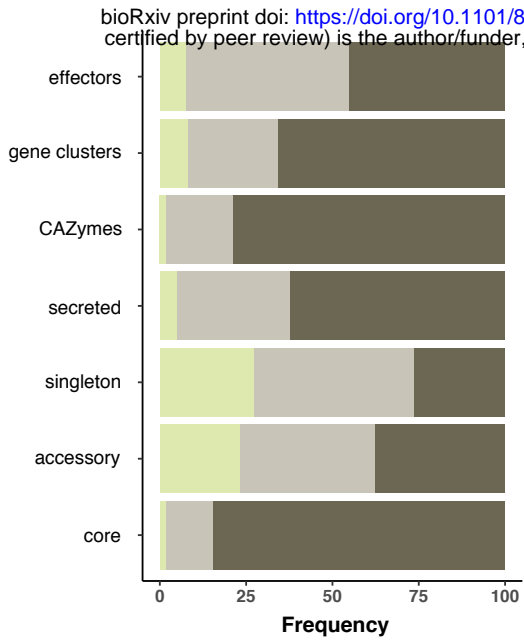**B**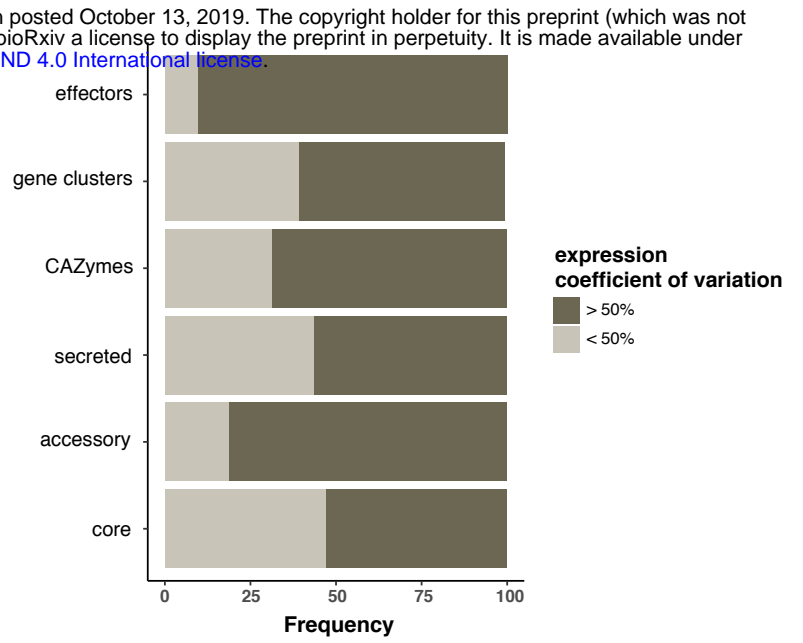**C**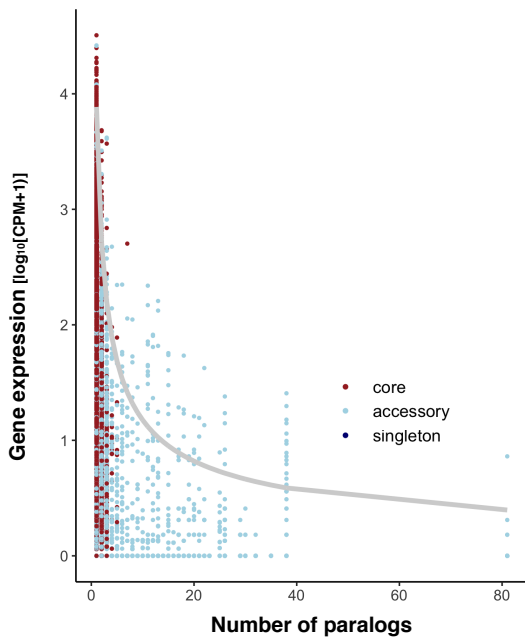**D**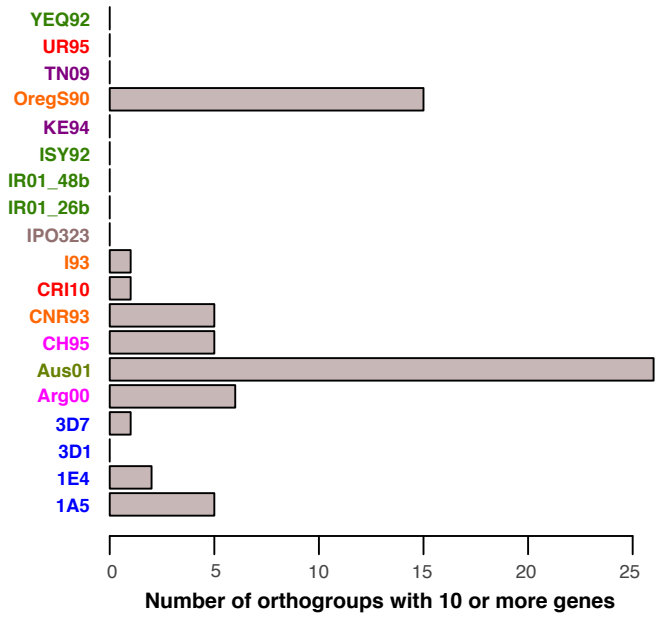

**A**

bioRxiv preprint doi: <https://doi.org/10.1101/803098>; this version posted October 13, 2019. The copyright holder for this preprint (which was not certified by peer review) is the author/funder, who has granted bioRxiv a license to display the preprint in perpetuity. It is made available under aCC-BY-NC-ND 4.0 International license.

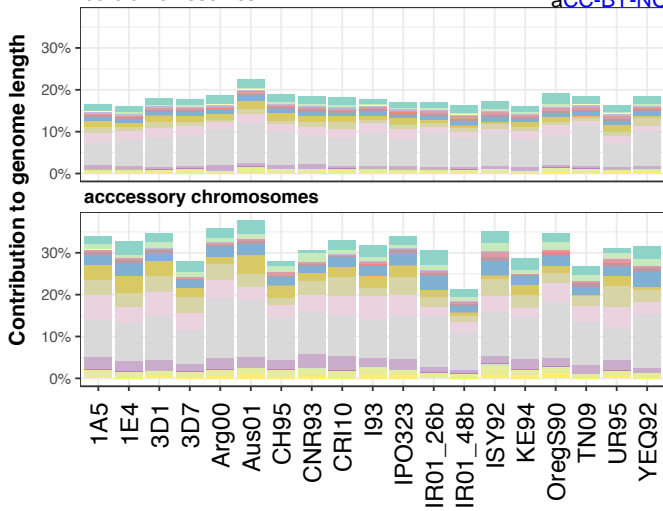**B**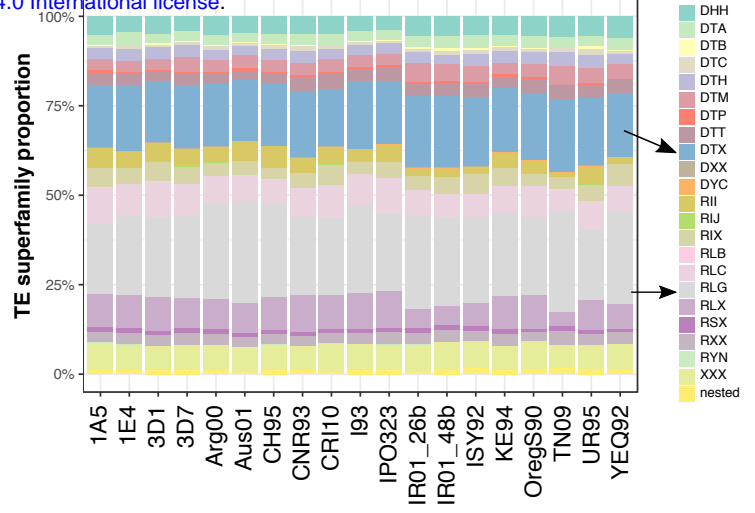**C**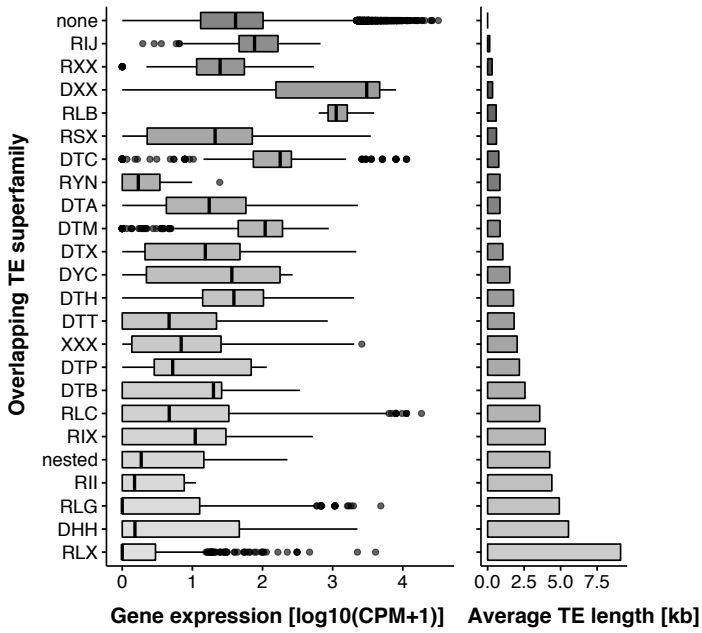**D**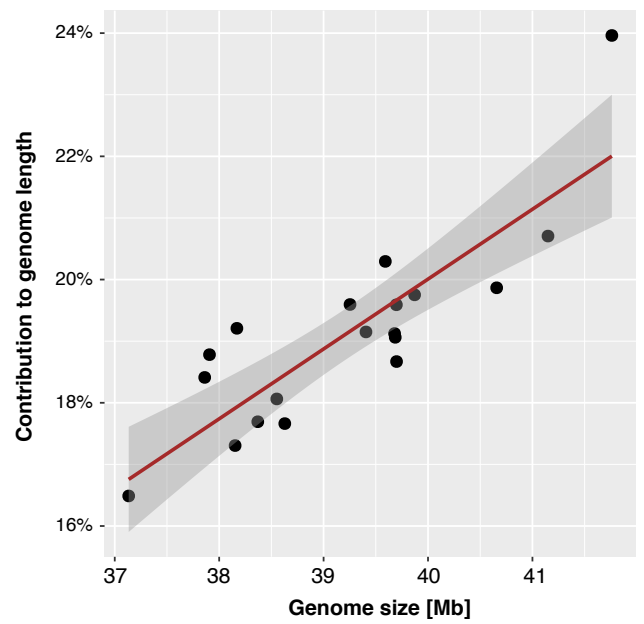

**A**

bioRxiv preprint doi: <https://doi.org/10.1101/803098>; this version posted October 13, 2019. The copyright holder for this preprint (which was not certified by peer review) is the author/funder, who has granted bioRxiv a license to display the preprint in perpetuity. It is made available under aCC-BY-NC-ND 4.0 International license.

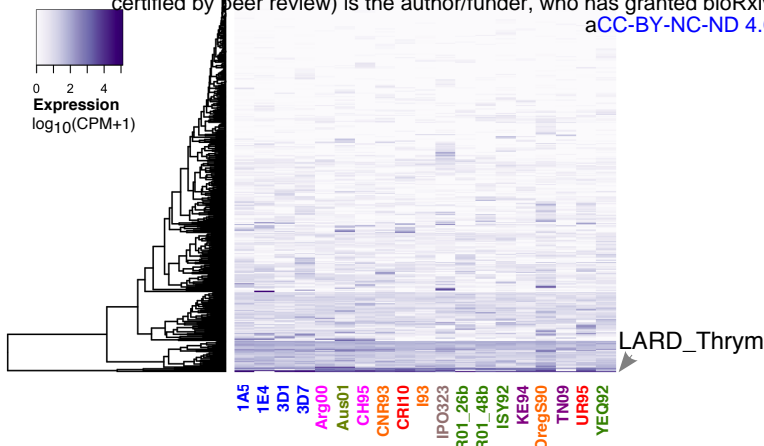**B**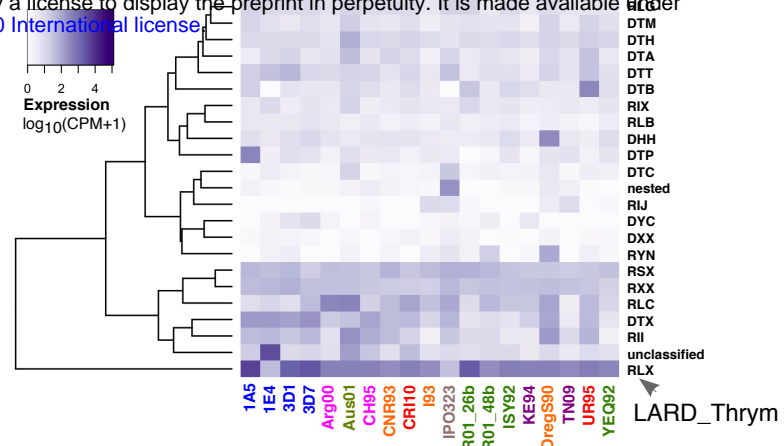**C**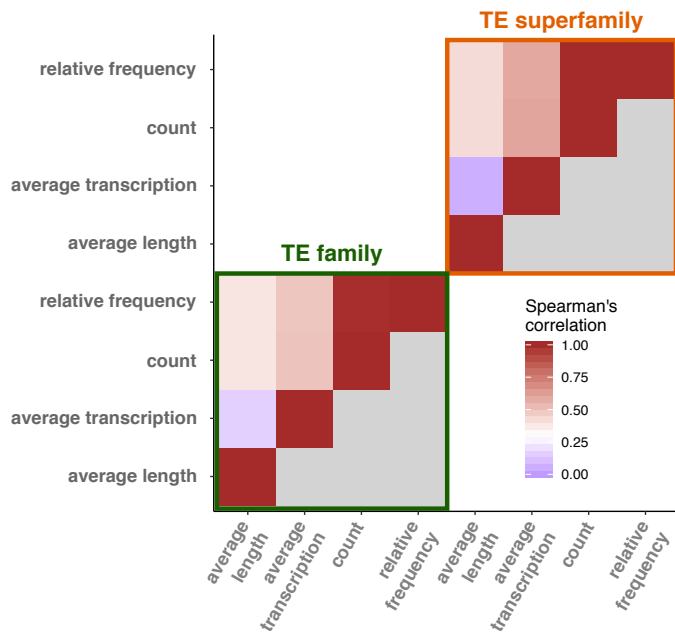**D**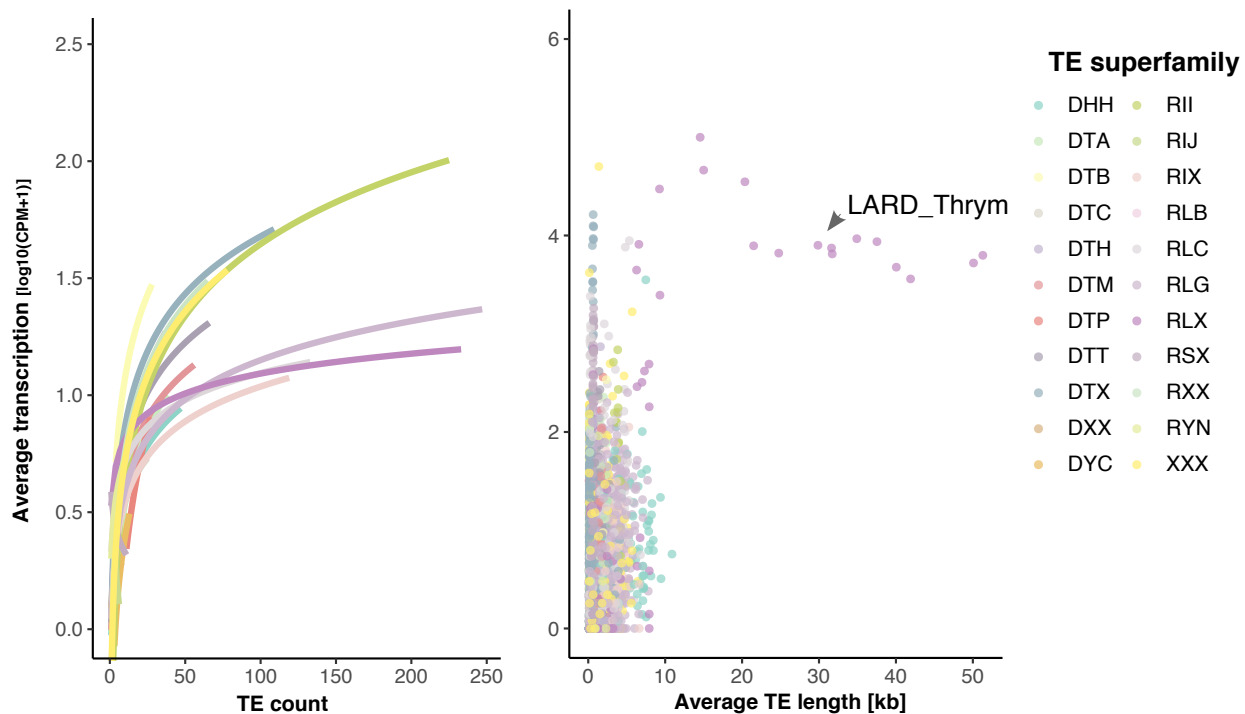

Source: https://www.biorxiv.org/content/10.1101/803098v1.full.pdf
